# Supplementary material for: Non-invasive prognostic protein biomarker signatures associated with colorectal cancer
Source: PubMed Central journal article supplement (PMC4568949; doi:10.15252/emmm.201404874), 2015-08-07
Supplement: emmm0007-1153-sd1.pdf [file emmm0007-1153-sd1.pdf]

# Appendix

## Non-invasive prognostic protein biomarker signatures associated with colorectal cancer

Silvia Surinova, Lenka Radová, Meena Choi, Josef Srovnal, Hermann Brenner, Olga Vitek, Marián Hajdúch, Ruedi Aebersold

### Table of contents

#### Appendix information

#### Pseudocode of predictive analyses

#### Appendix figures

**Appendix Fig. S1.** Stratification of survival based on the biomarker signature of CRC outcome

**Appendix Fig. S2.** Evaluation of the outcome biomarker signature in the GSE17536 transcriptomic data associated with TNM staging and overall survival (OS)

**Appendix Fig. S3.** Evaluation of the outcome biomarker signature in the GSE14333 transcriptomic data associated with Dukes staging and disease-free survival (DFS)

**Appendix Fig. S4.** Evaluation of the localization biomarker signature in proteomic and transcriptomic data sets acquired from the TCGA cohort

**Appendix Fig. S5.** Evaluation of the dissemination biomarker signature in the transcriptomic data set acquired from the TCGA cohort

#### Appendix tables

**Appendix Table S1.** Detectable candidate proteins in patient plasma

**Appendix Table S2.** Outcome biomarker signature development within 10-fold CV

**Appendix Table S3.** Reproducibility assessment of the outcome biomarker signature within 8-fold CV

**Appendix Table S4.** Regional localization biomarker signature development within 10-fold CV

**Appendix Table S5.** Reproducibility assessment of the regional localization biomarker signature within 8-fold CV

**Appendix Table S6.** Grading biomarker signature development within 10-fold CV

**Appendix Table S7.** Clinical stage biomarker signature development within 10-fold CV

**Appendix Table S8.** Disseminated disease biomarker signature development within 10-fold CV

**Appendix Table S9.** Reproducibility assessment of the disseminated disease biomarker signature within 8-fold CV

**Appendix Table S10.** Forced selection of clinical factors (i.e. age, gender, and stage) into predictive biomarker signatures for **a**, regional localization, and **b**, TNM metastasis status

**Appendix Table S11.** The performance of individual outcome signature proteins on the protein or transcript levels

**Appendix Table S12.** Classification of colon cancer subtypes (CCSs) based on the outcome signature proteins within 10-fold cross-validation of the GSE33113 data set.

**Appendix Table S13.** Classification of the five cellular phenotype subtypes based on the outcome signature proteins within **a**, 5-fold cross-validation of the GSE13294 data set, and **b**, 10-fold cross-validation of the GSE14333 data set.

**Appendix Table S14.** The performance of individual localization signature proteins on the protein or transcript levels

**Appendix Table S15.** Functional annotation of signature proteins with gene ontology (GO) biological process terms

## Additional information

### Pseudocode of predictive analyses

#### *5year overall survival – COX MODEL*

1. Dataset = patients in stages 1+2+3
2. denote: 0 = patient died until 5years, 1 = patient censored until 5years, 2 = patient survived 5 years timepoint
3. split patients into 10 folds with equivalent proportions of died until 5years (0), censored during 5years (1) and alive in 5years timepoint patients as in the whole dataset.
4. repeat for i in 1:10
  - a) PROT<sub>i</sub> = Preselected proteins by SRMstats
  - b) VALIDATION<sub>i</sub> = patients in fold i
  - c) TRAINING<sub>i</sub> = patients in all remaining folds (except i-th fold)
  - d) MODEL<sub>i</sub> = results of stepwise selection for Cox model with forced predictors (age, gender, stage) applied on dataset TRAINING<sub>i</sub>, with variables PROT<sub>i</sub> (model with minimal Akaike information criteria)
  - e) ROC<sub>i</sub> = survivalROC analysis for MODEL<sub>i</sub> on dataset VALIDATION<sub>i</sub> in timepoint t=5years
  - f) SIGNPROT<sub>i</sub> = proteins from MODEL<sub>i</sub>
5. PROT\_FINAL = proteins, which occur at least 5-times in SIGNPROT<sub>1</sub>, ..., SIGNPROT<sub>10</sub>
6. FULL\_MODEL = Cox model on all patients with variables age, gender, stage and PROT\_FINAL
7. survivalROC analysis on FULL\_MODEL in timepoint t=5years; output: black ROC curve in fig. 2a
8. bootstrap for censored data applied on FULL\_MODEL with 2000 replicate; output in table: standard errors of AUC, sensitivity, specificity and accuracy for FULL\_MODEL
9. ROC\_med = ROC<sub>i</sub> with 5th maximal AUC among ROC<sub>1</sub>, ..., ROC<sub>10</sub> in timepoint t=5years
10. plot ROC\_med; output: red ROC curve in fig. 2a
11. inter-quartile range of ROC<sub>1</sub>, ..., ROC<sub>10</sub> in each point; output: grey area in fig 2a
12. AUC, sensitivity, specificity and accuracy for ROC<sub>1</sub>, ... ,ROC<sub>10</sub> in timepoint t=5years; output in table: standard errors of AUC, sensitivity, specificity and accuracy
13. CLIN\_MODEL = Cox model on all patients with variables age, gender, stage
14. LR test to compare FULL\_MODEL and CLIN\_MODEL; output: p-value in text
15. PRED\_STAGE = individual predictions of CLIN\_MODEL for patients in dataset with fixed age:: 68 and fixed gender::MALE
16. plot PRED\_STAGE; output fig. 2b
17. PROT\_MODEL = Cox model with predictors PROT\_FINAL
18. PRED\_PROT = individual predictions of PROT\_MODEL

19. CATEGORY – split patients into 2 subsets
  - a) “HIGHrisk” – patients with  $PRED\_PROT = \text{median}(PRED\_PROT)$
  - b) “LOWrisk” – patients with  $PRED\_PROT < \text{median}(PRED\_PROT)$
20. MIXED\_MODEL = Cox model with predictors age, gender, stage, CATEGORY
21. plot individual predictions of MIXED\_MODEL with fixed age::68, gender::MALE and stage::1 (output fig.2c), stage::2 (output fig. 2d), stage::3 (output fig. 2e)
22. survival plot for stage; output Appendix fig. S1a
23. survival plot for CATEGORY with patients in stage 1; output: Appendix fig. S1b)
 

survival plot for CATEGORY with patients in stage 2; output: Appendix fig. S1c)

survival plot for CATEGORY with patients in stage 3; output: Appendix fig. S1d)

*Regional localization (CRC colon vs CRC rectum) – LOGISTIC MODEL*

1. denote: 0 = patient with DG colon, 1 = patient with DG rectum
2. split patients into 10 folds with equivalent proportions of diagnosis colon (0) and rectum (1) as in the whole dataset.
3. repeat for i in 1:10
  - a) PROT\_i = Preselected proteins by SRMstats
  - b) VALIDATION\_i = patients in fold i
  - c) TRAINING\_i = patients in all remaining folds (except i-th fold)
  - d) MODEL\_i = results of stepwise selection with logistic model applied on dataset TRAINING\_i, with variables PROT\_i (model with minimal Akaike information criteria)
  - e) ROC\_i = ROC analysis for MODEL\_i on dataset VALIDATION\_i
  - f) SIGNPROT\_i = proteins from MODEL\_i
4. PROT\_FINAL = proteins, which occur at least 5-times in SIGNPROT\_1, ..., SIGNPROT\_10
5. FULL\_MODEL = logistic regression model on all patients with variables PROT\_FINAL
6. ROC analysis on FULL\_MODEL; output: black ROC curve in fig. 4a
7. bootstrap FULL\_MODEL with 2000 replicate; output in table: standard errors of AUC, sensitivity, specificity and accuracy for FULL\_MODEL
8. ROC\_med = ROC\_i with 5th maximal AUC among ROC\_1, ..., ROC\_10
9. plot ROC\_med; output: red ROC curve in fig. 4a
10. inter-quartile range of ROC\_1, ..., ROC\_10 in each point; output: grey area in fig. 4a
11. AUC, sensitivity, specificity and accuracy for ROC\_1, ..., ROC\_10; output in table: standard errors of AUC, sensitivity, specificity and accuracy

*TNM metastasis status (CRC stage 1+2+3 vs CRC stage 4) – LOGISTIC MODEL*

1. denote: 0 = patient in stages 1+2+3, 1 = patient in stage4
2. split patients into 10 folds with equivalent proportions of early stages (0) and developed illness (1) as in the whole dataset.
3. repeat for  $i$  in 1:10
  - a) PROT <sub>$i$</sub>  = Preselected proteins by SRMstats
  - b) VALIDATION <sub>$i$</sub>  = patients in fold  $i$
  - c) TRAINING <sub>$i$</sub>  = patients in all remaining folds (except  $i$ -th fold)
  - d) MODEL <sub>$i$</sub>  = results of stepwise selection with logistic model applied on dataset TRAINING <sub>$i$</sub> , with variables PROT <sub>$i$</sub>  (model with minimal Akaike information criteria)
  - e) ROC <sub>$i$</sub>  = ROC analysis for MODEL <sub>$i$</sub>  on dataset VALIDATION <sub>$i$</sub>
  - f) SIGNPROT <sub>$i$</sub>  = proteins from MODEL <sub>$i$</sub>
4. PROT\_FINAL = proteins, which occur at least 5-times in SIGNPROT<sub>1</sub>, ..., SIGNPROT<sub>10</sub>
5. FULL\_MODEL = logistic regression model on all patients with variables PROT\_FINAL
6. ROC analysis on FULL\_MODEL; output: black ROC curve in fig. 4b
7. bootstrap FULL\_MODEL with 2000 replicate; output in table: standard errors of AUC, sensitivity, specificity and accuracy for FULL\_MODEL
8. ROC\_med = ROC <sub>$i$</sub>  with 5th maximal AUC among ROC<sub>1</sub>, ..., ROC<sub>10</sub>
9. plot ROC\_med; output: red ROC curve in fig. 4b
10. inter-quartile range of ROC<sub>1</sub>, ..., ROC<sub>10</sub> in each point; output: grey area in fig. 4b
11. AUC, sensitivity, specificity and accuracy for ROC<sub>1</sub>, ..., ROC<sub>10</sub>; output in table: standard errors of AUC, sensitivity, specificity and accuracy

## Appendix figures

**Appendix Fig. S1.** Stratification of survival based on the biomarker signature of CRC outcome. All collected survival data was used to plot stratified-survival based on a) stage 1, 2, or 3; b) stage 1 and signature proteins; c) stage 2 and signature proteins; and d) stage 3 and signature proteins. The signature proteins represent a linear combination of protein intensities ( $0.739 \cdot \text{HLA-A} - 1.143 \cdot \text{CFH} + 0.811 \cdot \text{CD44} + 0.334 \cdot \text{PTPRJ} + 0.398 \cdot \text{HP} - 0.869 \cdot \text{CDH5}$ ). The cutoff of  $-0.03685376$  used for stratification is the median of individual predictions for all patients in stages 1+2+3. HIGH risk group represents patients with individual predictions  $\geq$  cutoff and LOW risk group represents patients with individual predictions  $<$  cutoff. In the HIGH risk group, n=17 are at stage 1, n=29 are at stage 2, n=29 are at stage 3. In the LOW risk group, n=23 are at stage 1, n=29 are at stage 2, and n=22 are at stage 3. n represents the number of patients in each category.

**Appendix Fig. S2.** Evaluation of the outcome biomarker signature in the GSE17536 transcriptomic data associated with TNM staging and overall survival (OS). Data from 138 patients of stage I-III were used in this analysis, where 35 patients died until 5 years, 54 patients were censored until 5 years, and 49 patients survived longer than 5 years. a) Biomarker signature containing clinical factors (age, gender, stage) and gene proxies of all signature proteins predicting 5-year overall survival within 5-fold cross validation. The performance obtained on the cross-validated pseudomedian validation fold (i.e. between fold median; labeled in red), corresponding 25th (in magenta) and 75th (in orange) percentile bounds, and on the full data set (labeled in black). The individual training and validation areas under the ROC curves from the 5-fold cross validation are reported in the adjacent table. b-e) All collected survival data was used to plot predicted survival based on the Cox model fitted with fixed parameters (age=67, gender=male) and with b) stage 1, 2, or 3; c) stage 1 and signature genes; d) stage 2 and signature genes; and e) stage 3 and signature genes. HIGH risk group represents patients with individual predictions  $\geq$  cutoff and LOW risk group represents patients with individual predictions  $<$  cutoff.

**Appendix Fig. S3.** Evaluation of the outcome biomarker signature in the GSE14333 transcriptomic data associated with Dukes staging and disease-free survival (DFS). Data from 139 patients of Dukes stage A-C were used in this analysis, where 21 patients relapsed until 5 years, 88 patients were censored until 5 years, and 30 patients survived disease-free longer than 5 years. a) Biomarker signature containing clinical factors (age, gender, stage) and gene proxies of all signature proteins predicting 5-year DFS within 10-fold cross validation. The performance obtained on the cross-validated pseudomedian validation fold (i.e. between fold median; labeled in red), corresponding 25th (in magenta) and 75th (in orange) percentile bounds, and on the full data set (labeled in black). The individual training and validation areas under the ROC curves from the 10-fold cross validation are reported in the adjacent table. b-e) All collected survival data was used to plot predicted survival based on the Cox model fitted with fixed parameters (age=71, gender=male) and with b) stage A, B, or C; c) stage A and signature genes; d) stage B and signature genes; and e) stage C and signature genes. HIGH risk group represents patients with individual predictions  $\geq$  cutoff and LOW risk group represents patients with individual predictions  $<$  cutoff.

**Appendix Fig. S4.** Evaluation of the localization biomarker signature in proteomic and transcriptomic data sets acquired from the TCGA cohort. The performance of the signature proteins was assessed in a) 88 patients (colon tumors: n=58, rectal tumors: n=30) on the protein level, b) the same 88 patients on the transcript level, and c) a larger set of 270 patients (colon tumors: n=196, rectal tumors: n=74) on the transcript level.

**Appendix Fig. S5.** Evaluation of the dissemination biomarker signature in the transcriptomic data set acquired from the TCGA cohort. The performance of the signature proteins was assessed in the full set of 270 patients (localized CRC: n=224, metastatic CRC: n=40) on the transcript level.

## Appendix tables

**Appendix Table S1.** Detectable candidate proteins in patient plasma. Gene names, protein names, and accession codes were defined according to UniProt Knowledgebase ([www.uniprot.org](http://www.uniprot.org)).

| Gene name      | Accession | Protein name                                                            |
|----------------|-----------|-------------------------------------------------------------------------|
| A1AG2          | P19652    | Alpha-1-acid glycoprotein 2                                             |
| AFM            | P43652    | Afamin                                                                  |
| AHSG           | P02765    | Alpha-2-HS-glycoprotein (Fetuin-A)                                      |
| ANPEP          | P15144    | Aminopeptidase N                                                        |
| ANT3           | P01008    | Antithrombin-III (Serpin C1)                                            |
| AOC3           | Q16853    | Membrane primary amine oxidase                                          |
| APMAP          | Q9HDC9    | Adipocyte plasma membrane-associated protein                            |
| APOB           | P04114    | Apolipoprotein B-100                                                    |
| ATRN           | O75882    | Attractin                                                               |
| B3GN2          | Q9NY97    | UDP-GlcNAc:betaGal beta-1,3-N-acetylglucosaminyltransferase 2           |
| BTD            | P43251    | Biotinidase (Biotinase)                                                 |
| CADM1          | Q9BY67    | Cell adhesion molecule 1                                                |
| CD109          | Q6YHK3    | CD109 antigen                                                           |
| CD163          | Q86VB7    | Scavenger receptor cysteine-rich type 1 protein M130                    |
| CD44           | P16070    | CD44 antigen (Extracellular matrix receptor III) (Hyaluronate receptor) |
| CDH5           | P33151    | Cadherin-5 (CD144)                                                      |
| CFH            | P08603    | Complement factor H                                                     |
| CFI            | P05156    | Complement factor I                                                     |
| CLU            | P10909    | Clusterin                                                               |
| CNTN4          | Q8I WV2   | Contactin-4                                                             |
| CO4A           | P0C0L4    | Complement C4-A                                                         |
| CP             | P00450    | Ceruloplasmin                                                           |
| CTSD           | P07339    | Cathepsin D                                                             |
| DKFZp686C02220 | Q6N091    | Putative uncharacterized protein DKFZp686C02220                         |
| DPEP1          | P16444    | Dipeptidase 1                                                           |
| DSG2           | Q14126    | Desmoglein-2 (Cadherin family member 5)                                 |
| ECM1           | Q16610    | Extracellular matrix protein 1                                          |
| F11            | P03951    | Coagulation factor XI                                                   |
| F5             | P12259    | Coagulation factor V                                                    |
| FCGBP          | Q9Y6R7    | IgGfc-binding protein                                                   |
| FETUB          | Q9UGM5    | Fetuin-B                                                                |
| FGA            | P02671    | Fibrinogen alpha chain                                                  |
| FGG            | P02679    | Fibrinogen gamma chain                                                  |
| FHR3           | Q02985    | Complement factor H-related protein 3                                   |
| FN1            | P02751    | Fibronectin                                                             |
| GOLM1          | Q8NBJ4    | Golgi membrane protein 1 (Golgi phosphoprotein 2)                       |
| HLA-A          | P01892    | HLA class I histocompatibility antigen, A-2 alpha chain                 |
| HP             | P00738    | Haptoglobin                                                             |
| HPX            | P02790    | Hemopexin (Beta-1B-glycoprotein)                                        |
| HRG            | P04196    | Histidine-rich glycoprotein                                             |
| HYOU1          | Q9Y4L1    | Hypoxia up-regulated protein 1                                          |



|          |        |                                                                                     |
|----------|--------|-------------------------------------------------------------------------------------|
| ICAM1    | P05362 | Intercellular adhesion molecule 1 (CD54)                                            |
| ICAM2    | P13598 | Intercellular adhesion molecule 2 (CD102)                                           |
| IGFBP3   | P17936 | Insulin-like growth factor-binding protein 3                                        |
| IGHA2    | P01877 | Ig alpha-2 chain C region                                                           |
| IGHG1    | P01857 | Ig gamma-1 chain C region                                                           |
| IGHG2    | P01859 | Ig gamma-2 chain C region                                                           |
| IGHM     | P01871 | Ig mu chain C region                                                                |
| IGJ      | P01591 | Immunoglobulin J chain                                                              |
| ISLR     | O14498 | Immunoglobulin superfamily containing leucine-rich repeat protein                   |
| ITIH4    | Q14624 | Inter-alpha-trypsin inhibitor heavy chain H4                                        |
| KDR      | P35968 | Vascular endothelial growth factor receptor 2 (CD309)                               |
| KLKB1    | P03952 | Plasma kallikrein (Kininogenin)                                                     |
| KNG1     | P01042 | Kininogen-1 (Alpha-2-thiol proteinase inhibitor)                                    |
| LAMA2    | P24043 | Laminin subunit alpha-2                                                             |
| LAMP2    | P13473 | Lysosome-associated membrane glycoprotein 2 (CD107b)                                |
| LCN2     | P80188 | Neutrophil gelatinase-associated lipocalin (Oncogene 24p3)                          |
| LGALS3BP | Q08380 | Galectin-3-binding protein (Mac-2 BP) (Tumor-associated antigen 90K)                |
| LRG1     | P02750 | Leucine-rich alpha-2-glycoprotein                                                   |
| LUM      | P51884 | Lumican                                                                             |
| LYVE1    | Q9Y5Y7 | Lymphatic vessel endothelial hyaluronic acid receptor 1                             |
| MFAP4    | P55083 | Microfibril-associated glycoprotein 4                                               |
| MMRN1    | Q13201 | Multimerin-1 (EMILIN-4)                                                             |
| MPO      | P05164 | Myeloperoxidase                                                                     |
| MRC2     | Q9UBG0 | C-type mannose receptor 2 (CD280)                                                   |
| MST1     | Q13043 | Serine/threonine-protein kinase 4                                                   |
| NCAM1    | P13591 | Neural cell adhesion molecule 1 (CD56)                                              |
| NEO1     | Q92859 | Neogenin                                                                            |
| ORM1     | P02763 | Alpha-1-acid glycoprotein 1                                                         |
| PGCP     | Q9Y646 | Plasma glutamate carboxypeptidase                                                   |
| PIGR     | P01833 | Polymeric immunoglobulin receptor (Hepatocellular carcinoma-associated protein TB6) |
| PLTP     | P55058 | Phospholipid transfer protein                                                       |
| PLXDC2   | Q6UX71 | Plexin domain-containing protein 2 (Tumor endothelial marker 7-related protein)     |
| PLXNB2   | O15031 | Plexin-B2                                                                           |
| PON1     | P27169 | Serum paraoxonase/arylesterase 1                                                    |
| PRG4     | Q92954 | Proteoglycan 4                                                                      |
| PROC     | P04070 | Vitamin K-dependent protein C                                                       |
| PTPRJ    | Q12913 | Receptor-type tyrosine-protein phosphatase eta (CD148)                              |
| SERPINA1 | P01009 | Alpha-1-antitrypsin (Serpin A1)                                                     |
| SERPINA3 | P01011 | Alpha-1-antichymotrypsin (Cell growth-inhibiting gene 24/25 protein) (Serpin A3)    |
| SERPINA6 | P08185 | Corticosteroid-binding globulin (Serpin A6)                                         |
| SERPINA7 | P05543 | Thyroxine-binding globulin (Serpin A7)                                              |
| THBS1    | P07996 | Thrombospondin-1                                                                    |
| TIMP1    | P01033 | Tissue inhibitor of metalloproteinases 1                                            |
| TNC      | P24821 | Tenascin (Tenascin-C)                                                               |
| TRF      | P02787 | Serotransferrin (Transferrin)                                                       |
| VTN      | P04004 | Vitronectin                                                                         |
| VWF      | P04275 | von Willebrand factor                                                               |

**Appendix Table S2.** Outcome biomarker signature development within 10-fold CV. **a**, Differentially abundant proteins characterised as significant in the individual folds of the training dataset. **b**, Proteins selected into Cox regression models in individual folds. The consensus model contains clinical factors and proteins with a high frequency of occurrence in the individual folds. AUC values are reported. The median AUC presented in figure 2 is in bold. **c**, Parameters of the consensus Cox model, the linear combination of proteins, and the selected cutoff for survival prediction.

| <b>a</b>                                                                                         |                                                                                                                                                                                                                                                           |                         |                           |
|--------------------------------------------------------------------------------------------------|-----------------------------------------------------------------------------------------------------------------------------------------------------------------------------------------------------------------------------------------------------------|-------------------------|---------------------------|
| <b>Significant proteins for each fold (FDR&lt;0.05, fold change cut-off <math>\pm</math>1.1)</b> |                                                                                                                                                                                                                                                           |                         |                           |
| Fold                                                                                             | Differentially abundant proteins                                                                                                                                                                                                                          |                         |                           |
| 1                                                                                                | A1AG2, AFM, ANT3, APMAP, CD109, CD44, CDH5, CFH, CP, CTSD, DKFZp686N02209, DSG2, ECM1, F11, FETUB, FGA, FGG, HLA-A, HP, HYOU1, IGJ, ITIH4, KNG1, LAMP2, LCN2, LGALS3BP, LUM, MFAP4, MMRN1, MPO, MRC2, NCAM1, ORM1, PIGR, PTPRJ, SERPINA6, SERPINA7, TIMP1 |                         |                           |
| 2                                                                                                | ANT3, APMAP, CD109, CD44, CDH5, CFH, CP, CTSD, FETUB, FGA, FGG, HLA-A, HP, HRG, IGJ, ITIH4, KNG1, LAMP2, LCN2, LGALS3BP, LUM, LYVE1, MFAP4, MMRN1, MRC2, MST1, ORM1, PIGR, PLXDC2, PTPRJ, SERPINA6, SERPINA7, TIMP1, VTN                                  |                         |                           |
| 3                                                                                                | A1AG2, ANT3, APMAP, CD109, CD44, CDH5, CFH, CP, CTSD, ECM1, FCGBP, FETUB, FGA, FGG, HLA-A, HP, IGJ, ITIH4, KNG1, LAMP2, LGALS3BP, LRG1, MMRN1, MPO, MRC2, MST1, NCAM1, ORM1, PIGR, PTPRJ, SERPINA7, TIMP1, TNC, VTN                                       |                         |                           |
| 4                                                                                                | A1AG2, ANT3, APOB, APMAP, CD109, CD44, CDH5, CFH, CP, CTSD, DSG2, FCGBP, FETUB, FGA, FGG, HLA-A, HP, IGJ, ITIH4, KLKB1, KNG1, LAMP2, LGALS3BP, LRG1, LUM, MMRN1, MPO, MRC2, MST1, ORM1, PIGR, PTPRJ, SERPINA3, SERPINA6, SERPINA7, TIMP1, VTN             |                         |                           |
| 5                                                                                                | A1AG2, ANT3, CADM1, CD109, CD44, CFH, CP, CTSD, DSG2, ECM1, FCGBP, FETUB, FGA, FGG, HLA-A, HP, HYOU1, ICAM1, IGHM, IGJ, ITIH4, KLKB1, KNG1, LAMP2, LGALS3BP, LUM, MMRN1, MPO, MRC2, MST1, ORM1, PIGR, PLXDC2, PTPRJ, TIMP1, VTN                           |                         |                           |
| 6                                                                                                | A1AG2, AFM, ANT3, APMAP, CD109, CD44, CDH5, CFH, CP, CTSD, DKFZp686N02209, DSG2, ECM1, F5, FCGBP, FETUB, FGA, FGG, HLA-A, HP, HYOU1, IGJ, KNG1, LAMP2, LCN2, LGALS3BP, LUM, MMRN1, MPO, MRC2, MST1, NCAM1, ORM1, PIGR, PLXDC2, PTPRJ, TIMP1, TNC          |                         |                           |
| 7                                                                                                | ANT3, CD109, CD44, CDH5, CFH, CP, F11, FCGBP, FETUB, FGA, FGG, HLA-A, HP, IGJ, LGALS3BP, MMRN1, MPO, MRC2, PIGR, PLXDC2, PTPRJ, TIMP1                                                                                                                     |                         |                           |
| 8                                                                                                | A1AG2, ANT3, APMAP, CD44, CDH5, CFH, CP, DKFZp686N02209, ECM1, FETUB, FGA, FGG, GOLM1, HLA-A, HP, HYOU1, IGJ, KNG1, LGALS3BP, LUM, MMRN1, MPO, MRC2, NCAM1, ORM1, PIGR, PLXDC2, PTPRJ, SERPINA6, TIMP1, VTN                                               |                         |                           |
| 9                                                                                                | ANT3, APMAP, CD109, CD44, CDH5, CFH, CP, CTSD, FCGBP, FGA, FGG, HLA-A, HP, LAMP2, LGALS3BP, MFAP4, MMRN1, MPO, MRC2, MST1, ORM1, PIGR, PLXDC2, PTPRJ, SERPINA3, SERPINA7, TIMP1, VTN                                                                      |                         |                           |
| 10                                                                                               | ANT3, APMAP, CD109, CD44, CDH5, CFH, CP, CTSD, DSG2, F11, FGA, FGG, HLA-A, HP, IGJ, ITIH4, KNG1, LAMP2, LGALS3BP, MFAP4, MMRN1, MPO, MRC2, MST1, NCAM1, ORM1, PGCP, PTPRJ, Q5JNX2, TIMP1, VTN                                                             |                         |                           |
| <b>b</b>                                                                                         |                                                                                                                                                                                                                                                           |                         |                           |
| <b>Significant proteins selected into Cox regression models by stepwise selection</b>            |                                                                                                                                                                                                                                                           |                         |                           |
| Fold                                                                                             | Predictive Cox regression models                                                                                                                                                                                                                          | Training (9/10 dataset) | Validation (1/10 dataset) |
| 1                                                                                                | Gender, Age, Stage, CD44, CDH5, CFH, DKFZp686N02209, DSG2, FETUB, HLA-A, HP, IGJ, PTPRJ                                                                                                                                                                   | 0.77                    | 0.91                      |
| 2                                                                                                | Gender, Age, Stage, CDH5, CFH, FETUB, HLA-A, HP, PTPRJ                                                                                                                                                                                                    | 0.73                    | 0.70                      |
| 3                                                                                                | Gender, Age, Stage, A1AG2, CD44, CDH5, CFH, FCGBP, HLA-A, ITIH4                                                                                                                                                                                           | 0.74                    | 0.88                      |
| 4                                                                                                | Gender, Age, Stage, HLA-A, HP, KNG1, LAMP2                                                                                                                                                                                                                | 0.71                    | 0.79                      |
| 5                                                                                                | Gender, Age, Stage, DSG2, FCGBP, FGA, HLA-A, KNG1, LAMP2, PTPRJ                                                                                                                                                                                           | 0.76                    | <b>0.75</b>               |
| 6                                                                                                | Gender, Age, Stage, AFM, CDH5, DKFZp686N02209, DSG2, FCGBP, HLA-A, PTPRJ, TNC                                                                                                                                                                             | 0.73                    | 0.84                      |
| 7                                                                                                | Gender, Age, Stage, CD44, CDH5, CFH, FCGBP, FGG, HLA-A                                                                                                                                                                                                    | 0.73                    | 0.74                      |
| 8                                                                                                | Gender, Age, Stage, CD44, CFH, FETUB, GOLM1, HLA-A, HP, HYOU1, IGJ, LUM, MRC2, PTPRJ, SERPINA6                                                                                                                                                            | 0.77                    | 0.73                      |

|           |                                                                                                                                                                                    |      |      |
|-----------|------------------------------------------------------------------------------------------------------------------------------------------------------------------------------------|------|------|
| 9         | Gender, Age, Stage, CD44, CFH, HP, MPO, PTPRJ                                                                                                                                      | 0.74 | 0.74 |
| 10        | Gender, Age, Stage, CD109, CD44, CFH, DSG2, HLA-A                                                                                                                                  | 0.73 | 0.70 |
| Consensus | Gender, Age, Stage, HLA-A, CFH, CD44, PTPRJ, HP, CDH5                                                                                                                              |      | 0.72 |
| <b>c</b>  | <b>Consensus Cox model</b>                                                                                                                                                         |      |      |
| Model     | 0.01524931*Age - 0.07394655*Gender(male=1, female=0) + 0.40446192*Stage + 0.77439420*HLA-A - 0.91423495*CFH + 0.59998490*CD44 + 0.36973892*PTPRJ + 0.38526529*HP - 0.77461635*CDH5 |      |      |
| Cutoff    | -0.001                                                                                                                                                                             |      |      |

**Appendix Table S3.** Reproducibility assessment of the outcome biomarker signature within 8-fold CV. **a**, Differentially abundant proteins characterised as significant in the individual folds of the training dataset. **b**, Proteins selected into Cox regression models in individual folds. The consensus model contains clinical factors and proteins with a high frequency of occurrence in the individual folds. AUC values are reported.

| <b>a</b> | <b>Significant proteins for each fold (FDR&lt;0.05, fold change cut-off <math>\pm 1.1</math>)</b>                                                                                                                                                                               |                        |                          |
|----------|---------------------------------------------------------------------------------------------------------------------------------------------------------------------------------------------------------------------------------------------------------------------------------|------------------------|--------------------------|
| Fold     | Differentially abundant proteins                                                                                                                                                                                                                                                |                        |                          |
| 1        | ANT3, APMAP, CADM1, CD109, CD44, CFH, CP, CTSD, DKFZp686N02209, DSG2, FETUB, FGA, FGG, HLA-A, HP, HYOU1, IGHA2, IGJ, LAMP2, LGALS3BP, MFAP4, MMRN1, MPO, MRC2, MST1, NCAM1, ORM1, PIGR, PLXDC2, PTPRJ, TIMP1                                                                    |                        |                          |
| 2        | A1AG2, ANT3, APMAP, CADM1, CD44, CDH5, CP, FGA, FGG, HLA-A, HP, HYOU1, IGJ, ITIH4, KNG1, LGALS3BP, MFAP4, MMRN1, MRC2, MST1, NCAM1, ORM1, PIGR, PTPRJ, SERPINA6, SERPINA7, TIMP1, VWF                                                                                           |                        |                          |
| 3        | A1AG2, AFM, ANT3, APMAP, CADM1, CD109, CD44, CDH5, CFH, CP, CTSD, DKFZp686N02209, ECM1, F11, FGA, FGG, HLA-A, HP, HYOU1, ICAM1, IGJ, ITIH4, KNG1, LAMP2, LGALS3BP, LRG1, MFAP4, MMRN1, MPO, MRC2, MST1, NCAM1, ORM1, PIGR, PTPRJ, SERPINA6, SERPINA7, TIMP1                     |                        |                          |
| 4        | A1AG2, AFM, ANT3, APOB, APMAP, CADM1, CD109, CD44, CDH5, CFH, CP, CTSD, DSG2, FETUB, FGA, FGG, HLA-A, HP, ICAM1, IGJ, ITIH4, KNG1, LAMP2, LGALS3BP, LRG1, LUM, MFAP4, MMRN1, MPO, MRC2, MST1, ORM1, PGCP, PIGR, PLXDC2, PTPRJ, Q5JNX2, SERPINA3, SERPINA6, SERPINA7, TIMP1, VTN |                        |                          |
| 5        | ANT3, CD109, CD44, CDH5, CFH, FCGBP, FETUB, FGA, FGG, HLA-A, HP, LAMP2, LGALS3BP, MMRN1, MPO, MRC2, MST1, PIGR, PLXDC2, PTPRJ, TIMP1, VTN                                                                                                                                       |                        |                          |
| 6        | A1AG2, AFM, ANT3, APOB, APMAP, CADM1, CD109, CD44, CDH5, CFH, CP, CTSD, DKFZp686N02209, DSG2, ECM1, FETUB, FGA, FGG, HLA-A, HP, HYOU1, ICAM1, IGJ, ITIH4, KNG1, LAMP2, LGALS3BP, MFAP4, MMRN1, MPO, MRC2, MST1, NCAM1, ORM1, PLXDC2, PTPRJ, SERPINA7, TIMP1, VTN                |                        |                          |
| 7        | ANT3, CD109, CD44, CDH5, CFH, CP, FETUB, FGA, FGG, HLA-A, IGJ, ITIH4, MPO, MRC2, MST1, PIGR, SERPINA6                                                                                                                                                                           |                        |                          |
| 8        | ANT3, APMAP, CADM1, CD109, CD44, CDH5, CFH, FETUB, FGA, FGG, FN1, HLA-A, HP, KNG1, LAMP2, LUM, MFAP4, MMRN1, MPO, MRC2, NCAM1, PIGR, PTPRJ, VTN                                                                                                                                 |                        |                          |
| <b>b</b> | <b>Significant proteins selected into Cox regression models by stepwise selection</b>                                                                                                                                                                                           |                        |                          |
| Fold     | Predictive Cox regression models                                                                                                                                                                                                                                                | Training (7/8 dataset) | Validation (1/8 dataset) |
| 1        | Gender, Age, Stage, CADM1, HP, PTPRJ                                                                                                                                                                                                                                            | 0.71                   | 0.74                     |
| 2        | Gender, Age, Stage, A1AG2, APMAP, HLA-A, PTPRJ, SERPINA6, VWF                                                                                                                                                                                                                   | 0.76                   | 0.69                     |
| 3        | Gender, Age, Stage, CD44, CDH5, CFH, HLA-A, HP, ICAM1, PTPRJ                                                                                                                                                                                                                    | 0.75                   | 0.76                     |
| 4        | Gender, Age, Stage                                                                                                                                                                                                                                                              | 0.63                   | 0.52                     |
| 5        | Gender, Age, Stage, CD44, CDH5, CFH, HLA-A, LAMP2                                                                                                                                                                                                                               | 0.73                   | 0.80                     |
| 6        | Gender, Age, Stage, AFM, DKFZp686N02209, FETUB, HLA-A, HYOU1, PTPRJ                                                                                                                                                                                                             | 0.74                   | 0.77                     |
| 7        | Gender, Age, Stage, CD44, CDH5, CFH, FETUB, HLA-A                                                                                                                                                                                                                               | 0.73                   | 0.66                     |
| 8        | Gender, Age, Stage, APMAP, CADM1, CD109,                                                                                                                                                                                                                                        | 0.78                   | 0.86                     |

|           |                                                       |      |
|-----------|-------------------------------------------------------|------|
|           | CD44, CDH5, CFH, HLA-A, LUM, MFAP4, MRC2, PIGR, PTPRJ |      |
| Consensus | Gender, Age, Stage, CD44, CDH5, CFH, PTPRJ, HLA-A     | 0.71 |

**Appendix Table S4.** Regional localization (colon versus rectum) biomarker signature development within 10-fold CV. **a**, Differentially abundant proteins characterised as significant in the individual folds of the training dataset. **b**, Proteins selected into logistic regression models in individual folds. The consensus model contains proteins with a high frequency of occurrence in the individual folds. AUC values are reported. The median AUC presented in figure 2 is in bold. **c**, Parameters of the consensus model, the linear combination of proteins, and the selected cutoff for regional localization prediction.

| <b>a</b>  | <b>Significant proteins for each fold (FDR&lt;0.05, fold change cut-off <math>\pm</math>1.1)</b>                                                                                   |                         |                           |
|-----------|------------------------------------------------------------------------------------------------------------------------------------------------------------------------------------|-------------------------|---------------------------|
| Fold      | Differentially abundant proteins                                                                                                                                                   |                         |                           |
| 1         | CADM1, CD163, CDH5, CTSD, F5, FHR3, FN1, GOLM1, HLA-A, HRG, HYOU1, KDR, LCN2, LGALS3BP, LRG1, MRC2, ORM1, PON1, TIMP1, VTN                                                         |                         |                           |
| 2         | CADM1, CD163, CD44, CDH5, CFH, CP, CTSD, F5, FHR3, FN1, GOLM1, HLA-A, HYOU1, LCN2, LGALS3BP, LRG1, MFAP4, MRC2, ORM1, PON1, PRG4, TIMP1, VTN                                       |                         |                           |
| 3         | CADM1, CD163, CDH5, CP, CTSD, F5, FETUB, FHR3, FN1, GOLM1, HLA-A, HYOU1, ICAM1, ICAM2, IGHM, LCN2, LGALS3BP, LRG1, MFAP4, MRC2, ORM1, PON1, PRG4, TIMP1, VTN                       |                         |                           |
| 4         | CADM1, CD109, CD163, CDH5, CP, CTSD, F5, FHR3, GOLM1, HLA-A, HYOU1, LCN2, LGALS3BP, LRG1, MPO, MRC2, ORM1, PON1, TIMP1, VTN                                                        |                         |                           |
| 5         | CADM1, CD109, CD163, CDH5, CFH, CP, CTSD, F5, FCGBP, FHR3, HLA-A, HYOU1, KDR, LGALS3BP, LRG1, MFAP4, MPO, MRC2, ORM1, PRG4, TIMP1                                                  |                         |                           |
| 6         | CADM1, CD163, CFH, CTSD, F5, FCGBP, FHR3, FN1, HLA-A, HYOU1, LGALS3BP, LRG1, MPO, MRC2, ORM1, PIGR, PON1, PRG4, Q6N091, TIMP1, VTN                                                 |                         |                           |
| 7         | CADM1, CD109, CD163, CTSD, F5, FHR3, FN1, HLA-A, HYOU1, LCN2, LGALS3BP, LRG1, MPO, MRC2, ORM1, PON1, TIMP1, VTN                                                                    |                         |                           |
| 8         | CADM1, CD163, CP, CTSD, F5, FHR3, FN1, GOLM1, HLA-A, HYOU1, LCN2, LGALS3BP, LRG1, MPO, MRC2, ORM1, PON1, TIMP1, VTN                                                                |                         |                           |
| 9         | CADM1, CD163, CD44, CDH5, CP, CTSD, F5, FHR3, FN1, HLA-A, HP, HYOU1, LCN2, LGALS3BP, LRG1, MFAP4, MMRN1, MPO, MRC2, ORM1, PON1, PRG4, TIMP1, VTN                                   |                         |                           |
| 10        | A1AG2, APMAP, CADM1, CD163, CD44, CDH5, CFH, CP, CTSD, F5, FHR3, FN1, GOLM1, HLA-A, HYOU1, ICAM1, ICAM2, LCN2, LGALS3BP, LRG1, MPO, MRC2, ORM1, PRG4, Q6N091, SERPINA1, TIMP1, TNC |                         |                           |
| <b>b</b>  | <b>Significant proteins selected into logistic regression models by stepwise selection</b>                                                                                         |                         |                           |
| Fold      | Predictive logistic regression models                                                                                                                                              | Training (9/10 dataset) | Validation (1/10 dataset) |
| 1         | CADM1, FN1, HRG, HYOU1, LGALS3BP, LRG1, MRC2, TIMP1, VTN                                                                                                                           | 0.79                    | 0.48                      |
| 2         | CADM1, FN1, HYOU1, LGALS3BP, MRC2, VTN                                                                                                                                             | 0.73                    | 0.82                      |
| 3         | CADM1, FN1, HYOU1, LGALS3BP, VTN                                                                                                                                                   | 0.74                    | 0.58                      |
| 4         | CADM1, CD109, LGALS3BP, LRG1, MRC2, PON1                                                                                                                                           | 0.76                    | 0.56                      |
| 5         | CADM1, CD109, HYOU1, LGALS3BP, LRG1                                                                                                                                                | 0.75                    | <b>0.66</b>               |
| 6         | CADM1, FN1, HYOU1, LGALS3BP, MRC2, VTN                                                                                                                                             | 0.76                    | 0.43                      |
| 7         | CADM1, CD109, FN1, HYOU1, LGALS3BP, LRG1, MRC2, VTN                                                                                                                                | 0.77                    | 0.71                      |
| 8         | CADM1, FN1, HYOU1, LGALS3BP, LRG1, MRC2, VTN                                                                                                                                       | 0.74                    | 0.81                      |
| 9         | CADM1, FN1, HP, HYOU1, LGALS3BP, LRG1, MMRN1, VTN                                                                                                                                  | 0.77                    | 0.80                      |
| 10        | CADM1, FN1, HYOU1, ICAM2, LGALS3BP                                                                                                                                                 | 0.75                    | 0.53                      |
| Consensus | CADM1, LGALS3BP, HYOU1, FN1, VTN, LRG1, MRC2                                                                                                                                       |                         | 0.75                      |
| <b>c</b>  | <b>Consensus model where rectal tumors=1, others =0</b>                                                                                                                            |                         |                           |
| Model     | 15.6909187 - 0.5859094*CADM - 0.5426449*LGALS3BP - 0.5356852*HYOU1 + 0.4039757*FN1                                                                                                 |                         |                           |

|        |                                                   |
|--------|---------------------------------------------------|
|        | + 0.4549288*VTN - 0.3022558*LRG1 - 0.7189315*MRC2 |
| Cutoff | 0.272                                             |

**Appendix Table S5.** Reproducibility assessment of the regional localization (colon versus rectum) biomarker signature within 8-fold CV. **a**, Differentially abundant proteins characterised as significant in the individual folds of the training dataset. **b**, Proteins selected into logistic regression models in individual folds. The consensus model contains proteins with a high frequency of occurrence in the individual folds. AUC values are reported.

| <b>a</b>  | <b>Significant proteins for each fold (FDR&lt;0.05, fold change cut-off <math>\pm</math>1.1)</b>                                                             |                        |                          |
|-----------|--------------------------------------------------------------------------------------------------------------------------------------------------------------|------------------------|--------------------------|
| Fold      | Differentially abundant proteins                                                                                                                             |                        |                          |
| 1         | ATRN, CADM1, CD109, CD163, CD44, CDH5, CFH, CLU, CTSD, F5, FHR3, FN1, HLA-A, HYOU1, IGHG2, IGHM, LCN2, LGALS3BP, LRG1, LUM, MPO, MRC2, ORM1, PON1, PRG4, VTN |                        |                          |
| 2         | A1AG2, CADM1, CD109, CD163, CDH5, CFH, CTSD, F5, FHR3, HLA-A, HYOU1, ICAM1, IGJ, LCN2, LGALS3BP, LRG1, MPO, MRC2, ORM1, PIGR, PON1, TIMP1                    |                        |                          |
| 3         | CADM1, CD163, CDH5, CP, CTSD, F5, FHR3, GOLM1, HLA-A, HYOU1, ICAM1, LGALS3BP, LRG1, MFAP4, MMRN1, MPO, MRC2, ORM1, PON1, PRG4, TIMP1                         |                        |                          |
| 4         | CADM1, CD163, CD44, CP, CTSD, F5, FHR3, FN1, GOLM1, HLA-A, HYOU1, ICAM2, IGHA2, LCN2, LGALS3BP, LRG1, MFAP4, MMRN1, MPO, MRC2, ORM1, PON1, PRG4, TIMP1, VTN  |                        |                          |
| 5         | CADM1, CD109, CD163, CDH5, CFH, CP, CTSD, F5, FCGBP, FHR3, HLA-A, HYOU1, KDR, LGALS3BP, LRG1, MFAP4, MPO, MRC2, ORM1, PRG4, TIMP1                            |                        |                          |
| 6         | APMAP, CADM1, CD163, CDH5, CFH, CP, CTSD, F5, FHR3, FN1, GOLM1, HLA-A, HP, HYOU1, LCN2, LGALS3BP, LRG1, MPO, MRC2, ORM1, PON1, TIMP1, VTN                    |                        |                          |
| 7         | CADM1, CD163, CDH5, CTSD, F5, FHR3, FN1, HLA-A, HYOU1, LGALS3BP, LRG1, MRC2, PON1, VTN                                                                       |                        |                          |
| 8         | AFM, CADM1, CD163, CTSD, F5, FHR3, FN1, HLA-A, HYOU1, ICAM2, LCN2, LGALS3BP, LRG1, MPO, MRC2, ORM1, PIGR, PON1, PRG4, TIMP1, TNC, VTN                        |                        |                          |
| <b>b</b>  | <b>Significant proteins selected into logistic regression models by stepwise selection</b>                                                                   |                        |                          |
| Fold      | Predictive logistic regression models                                                                                                                        | Training (7/8 dataset) | Validation (1/8 dataset) |
| 1         | CADM1, CD109, CDH5, FN1, HLA-A, HYOU1, LGALS3BP, LUM, MRC2                                                                                                   | 0.79                   | 0.58                     |
| 2         | CADM1, CD109, ICAM1, IGJ, LGALS3BP, LRG1, MRC2                                                                                                               | 0.75                   | 0.60                     |
| 3         | CADM1, CP, HYOU1, LGALS3BP, LRG1, MMRN1, MPO, PRG4                                                                                                           | 0.77                   | 0.48                     |
| 4         | HYOU1, IGHA2, LGALS3BP, LRG1, MRC2, VTN                                                                                                                      | 0.74                   | 0.58                     |
| 5         | CADM1, CD109, FETUB, HP, HYOU1, LGALS3BP, LRG1                                                                                                               | 0.77                   | 0.69                     |
| 6         | CADM1, FN1, HLA-A, HYOU1, LGALS3BP, LRG1, MRC2, TIMP1, VTN                                                                                                   | 0.78                   | 0.63                     |
| 7         | CADM1, FN1, HYOU1, LGALS3BP, VTN                                                                                                                             | 0.72                   | 0.82                     |
| 8         | AFM, CADM1, HYOU1, LGALS3BP, LRG1, VTN                                                                                                                       | 0.77                   | 0.67                     |
| Consensus | MRC2, VTN, LRG1, CADM1, HYOU1, LGALS3BP                                                                                                                      |                        | 0.72                     |

**Appendix Table S6.** Grading biomarker signature development within 10-fold CV. **a**, Differentially abundant proteins characterised as significant in the individual folds of the training dataset. **b**, Proteins selected into logistic regression models in individual folds. The consensus model contains proteins with a high frequency of occurrence in the individual folds. AUC values are reported.

| <b>a</b> | <b>Significant proteins for each fold (FDR&lt;0.05, fold change cut-off <math>\pm</math>1.1)</b> |  |  |
|----------|--------------------------------------------------------------------------------------------------|--|--|
| Fold     | Differentially abundant proteins                                                                 |  |  |
| 1        | AHSB, ANT3, ATRN, CD109, CDH5, CFH, CLU, DSG2, F11, F5, FETUB, FGA, GOLM1, HPX, HRG,             |  |  |

|           |                                                                                                                                                                                                                                                                                                   |                         |                           |
|-----------|---------------------------------------------------------------------------------------------------------------------------------------------------------------------------------------------------------------------------------------------------------------------------------------------------|-------------------------|---------------------------|
|           | IGJ, KLKB1, LCN2, LGALS3BP, LRG1, LUM, LYVE1, MST1, NCAM1, ORM1, PGCP, PLXDC2, PLXNB2, PRG4, SERPINA3, THBS1, VWF                                                                                                                                                                                 |                         |                           |
| 2         | A1AG2, AHSG, ANT3, ATRN, BTD, CADM1, CD109, CD44, CFH, CFI, CLU, CTSD, DSG2, FETUB, FGA, GOLM1, HLA-A, HPX, HRG, ICAM2, IGJ, KLKB1, LCN2, LGALS3BP, LUM, LYVE1, MPO, NCAM1, PGCP, PRG4, PROC, SERPINA3, VWF                                                                                       |                         |                           |
| 3         | A1AG2, AHSG, ANT3, ATRN, BTD, CADM1, CD109, CD44, CFH, CFI, CLU, CTSD, DKFZp686N02209, DSG2, ECM1, F11, F5, FETUB, FGA, FHR3, FN1, GOLM1, HPX, HRG, IGFBP3, IGHA2, KLKB1, LCN2, LGALS3BP, LRG1, LUM, LYVE1, MPO, MST1, NCAM1, PGCP, PLXNB2, PON1, PRG4, Q5JNX2, SERPINA3, SERPINA6, SERPINA7, VWF |                         |                           |
| 4         | A1AG2, AHSG, ANT3, ATRN, BTD, CADM1, CD109, CD44, CFH, CLU, DKFZp686N02209, DSG2, ECM1, FETUB, FGA, GOLM1, HPX, HRG, IGHA2, IGHG2, IGJ, LCN2, LGALS3BP, LUM, LYVE1, MPO, MRC2, MST1, NCAM1, PGCP, PON1, PRG4, SERPINA1, SERPINA3, THBS1, TIMP1, VWF                                               |                         |                           |
| 5         | A1AG2, AFM, AHSG, ANT3, ATRN, BTD, CADM1, CD109, CD44, CDH5, CFH, CFI, CLU, CP, CTSD, DSG2, ECM1, F11, F5, FETUB, FGA, FN1, GOLM1, HLA-A, HPX, HRG, IGFBP3, KLKB1, LCN2, LUM, LYVE1, MFAP4, MRC2, MST1, NCAM1, PGCP, PLXNB2, PRG4, Q5JNX2, SERPINA6, SERPINA7, VWF                                |                         |                           |
| 6         | A1AG2, AHSG, ANT3, BTD, CADM1, CD109, CD44, CFH, CLU, DSG2, ECM1, F5, FETUB, FGA, FHR3, GOLM1, HPX, HRG, KLKB1, LCN2, LGALS3BP, LRG1, LUM, LYVE1, MRC2, MST1, NCAM1, PGCP, PLTP, PLXDC2, PLXNB2, PON1, SERPINA3, THBS1, VWF                                                                       |                         |                           |
| 7         | A1AG2, AFM, AHSG, ANT3, BTD, CADM1, CD109, CD44, CFH, CFI, CLU, DKFZp686N02209, DSG2, ECM1, F11, F5, FETUB, FGA, FHR3, FN1, GOLM1, HPX, HRG, IGFBP3, KLKB1, KNG1, LAMP2, LCN2, LRG1, LUM, LYVE1, MST1, NCAM1, PGCP, PLXNB2, PON1, PRG4, Q5JNX2, SERPINA3, SERPINA7, THBS1, VWF                    |                         |                           |
| 8         | AHSG, ANT3, ATRN, BTD, CADM1, CD109, CFH, CFI, CLU, DSG2, F11, FETUB, FGA, FHR3, GOLM1, HPX, HRG, ICAM2, KLKB1, LCN2, LGALS3BP, LRG1, LUM, LYVE1, MRC2, MST1, NCAM1, PGCP, PLXNB2, PON1, PRG4, SERPINA3, VWF                                                                                      |                         |                           |
| 9         | AHSG, ANT3, ATRN, BTD, CADM1, CD109, CFH, CLU, DSG2, FETUB, FGA, GOLM1, HLA-A, HP, HPX, HRG, KLKB1, LCN2, LGALS3BP, LUM, LYVE1, MPO, NCAM1, ORM1, PGCP, PLXNB2, PON1, PRG4, SERPINA3, SERPINA7, THBS1, TIMP1, VWF                                                                                 |                         |                           |
| 10        | A1AG2, AHSG, ANT3, BTD, CADM1, CD109, CD44, CFH, CFI, CLU, CTSD, DSG2, F11, FETUB, FGA, FHR3, FN1, GOLM1, HPX, HRG, IGFBP3, IGHM, KLKB1, LCN2, LGALS3BP, LUM, LYVE1, MFAP4, MMRN1, MST1, NCAM1, ORM1, PGCP, PLXNB2, PON1, PRG4, SERPINA3, SERPINA7, TNC, VWF                                      |                         |                           |
| <b>b</b>  | <b>Significant proteins selected into logistic regression models by stepwise selection</b>                                                                                                                                                                                                        |                         |                           |
|           |                                                                                                                                                                                                                                                                                                   |                         |                           |
| Fold      | Predictive logistic regression models                                                                                                                                                                                                                                                             | Training (9/10 dataset) | Validation (1/10 dataset) |
| 1         | ATR, CD109, CLU, DSG2, FGA, LGALS3BP, LYVE1, NCAM1, PGCP                                                                                                                                                                                                                                          | 0.62                    | 0.42                      |
| 2         | CD109, CD44, CFH, CLU, FGA, HRG, IGJ, KLKB1, LYVE1, MPO, PGCP, PRG4                                                                                                                                                                                                                               | 0.62                    | 0.53                      |
| 3         | CD109, CFH, CLU, CTSD, DSG2, ECM1, LYVE1, MPO, PGCP, PRG4                                                                                                                                                                                                                                         | 0.61                    | 0.50                      |
| 4         | CD109, CFH, CLU, DSG2, ECM1, FGA, IGJ, LGALS3BP, LYVE1, NCAM1, PGCP, PRG4, THBS1                                                                                                                                                                                                                  | 0.60                    | 0.70                      |
| 5         | AFM, CD109, CFH, CLU, CTSD, ECM1, HRG, NCAM1, PGCP, PRG4, VWF                                                                                                                                                                                                                                     | 0.62                    | 0.61                      |
| 6         | CD109, CLU, ECM1, FGA, KLKB1, LYVE1, NCAM1, PON1, THBS1, VWF                                                                                                                                                                                                                                      | 0.55                    | 0.61                      |
| 7         | BTD, CD109, CFH, CLU, DSG2, ECM1, FHR3, KLKB1, KNG1, LYVE1, PGCP, PRG4, THBS1                                                                                                                                                                                                                     | 0.62                    | 0.50                      |
| 8         | CD109, CLU, FGA, KLKB1, LGALS3BP, LYVE1, NCAM1, PGCP, PON1                                                                                                                                                                                                                                        | 0.59                    | 0.39                      |
| 9         | ATR, CD109, CLU, DSG2, FGA, HPX, LYVE1, NCAM1, PGCP, THBS1, VWF                                                                                                                                                                                                                                   | 0.62                    | 0.61                      |
| 10        | ANT3, CD109, CFI, CLU, IGFBP3, LYVE1, MFAP4, MST1, NCAM1, ORM1, PGCP, PON1, TNC                                                                                                                                                                                                                   | 0.64                    | 0.39                      |
| Consensus | CLU, CD109, LYVE1, PGCP, NCAM1, FGA, PRG4, ECM1                                                                                                                                                                                                                                                   |                         |                           |

**Appendix Table S7.** Clinical stage biomarker signature development within 10-fold CV. **a**, Differentially abundant proteins characterised as significant in the individual folds of the training dataset. **b**, Proteins

selected into logistic regression models in individual folds. The consensus model contains proteins with a high frequency of occurrence in the individual folds. AUC values are reported.

| a    | Significant proteins for each fold (FDR<0.05, fold change cut-off $\pm 1.1$ )                                                                                                                                                                                                                                                                                                                                                                                                            |
|------|------------------------------------------------------------------------------------------------------------------------------------------------------------------------------------------------------------------------------------------------------------------------------------------------------------------------------------------------------------------------------------------------------------------------------------------------------------------------------------------|
| Fold | Differentially abundant proteins                                                                                                                                                                                                                                                                                                                                                                                                                                                         |
| 1    | HLA-A, MPO, CDH5, CFI, LRG1, PIGR, FETUB, F5, FHR3, FN1, CFH, HPX, IGHG2, LGALS3BP, DKFZp686N02209, VWF, MRC2, FCGBP, PLTP, FGG, BTD, IGFBP3, HP, CTSD, AFM, Q5JNX2, MFAP4, NCAM1, DSG2, ICAM2, LYVE1, HRG, CD163, KNG1, KLKB1, CD109, TNC, LUM, AOC3, CLU, FGA, SERPINA3, ATRN, VTN, TIMP1, PON1, CADM1, APMAP, ANT3, F11, LCN2, IGHA2, PLXDC2, ITIH4, IGHM, CD44, HYOU1, ICAM1, THBS1, ECM1, PTPRJ, GOLM1, PRG4, SERPINA6, IGJ, PROC, SERPINA1, PGCP                                   |
| 2    | CFI, HPX, PIGR, LRG1, F5, FETUB, HLA-A, AFM, IGHG2, FHR3, DKFZp686N02209, FN1, MRC2, CFH, FCGBP, MPO, THBS1, ICAM2, HRG, BTD, PLTP, AHSG, SERPINA3, VWF, NCAM1, CDH5, LGALS3BP, ATRN, ORM1, FGG, HP, APMAP, AOC3, MFAP4, KNG1, CTSD, Q5JNX2, LYVE1, CLU, CD109, LCN2, LUM, ICAM1, TIMP1, CD163, IGHA2, DSG2, PLXDC2, PTPRJ, VTN, TNC, GOLM1, F11, ANT3, CD44, KLKB1, IGJ, SERPINA1, PGCP, PON1, ITIH4, CADM1, PLXNB2, PROC, FGA, ECM1, PRG4, IGHM, APOB                                  |
| 3    | LGALS3BP, MPO, CFI, F5, LRG1, PIGR, HPX, FHR3, FETUB, FN1, FGG, CFH, IGHG2, ICAM2, MRC2, DKFZp686N02209, CDH5, PLTP, AFM, FCGBP, HLA-A, TNC, LYVE1, BTD, KNG1, AHSG, F11, HRG, AOC3, CD163, CLU, THBS1, TIMP1, CD109, VWF, LCN2, NCAM1, KLKB1, PLXDC2, GOLM1, Q5JNX2, CTSD, SERPINA3, MFAP4, HP, APMAP, LUM, ANT3, SERPINA7, IGHA2, DSG2, ATRN, ICAM1, CADM1, PON1, PTPRJ, VTN, ITIH4, PRG4, IGHM, IGJ, PROC, HYOU1, SERPINA6, ORM1, APOB, FGA, CD44, PGCP, IGFBP3, A1AG2, PLXNB2        |
| 4    | MPO, CFI, PIGR, LRG1, FN1, AFM, F5, FETUB, HPX, CFH, IGHG2, THBS1, HLA-A, DKFZp686N02209, FHR3, FCGBP, ICAM2, PLTP, LGALS3BP, NCAM1, FGG, BTD, CDH5, CLU, MRC2, LUM, PON1, F11, HRG, KNG1, VWF, AHSG, VTN, LYVE1, APMAP, KLKB1, ATRN, LCN2, CD163, AOC3, SERPINA7, HP, ANT3, SERPINA3, TIMP1, APOB, ICAM1, ITIH4, MFAP4, PRG4, Q5JNX2, PLXDC2, PTPRJ, GOLM1, TNC, SERPINA6, DSG2, IGHA2, ORM1, CP, ECM1, CTSD, FGA, PROC, IGHM, HYOU1, IGJ, SERPINA1, IGFBP3, CD44, PLXNB2, CD109, A1AG2 |
| 5    | LGALS3BP, MPO, CFI, HPX, LRG1, PIGR, DKFZp686N02209, F5, FETUB, IGHG2, ICAM2, FCGBP, MRC2, FN1, CFH, FHR3, PLTP, CDH5, HLA-A, CTSD, AFM, FGG, SERPINA3, ITIH4, LUM, CLU, HRG, THBS1, NCAM1, CD163, VWF, PON1, HP, MFAP4, TNC, TIMP1, SERPINA6, Q5JNX2, CP, SERPINA7, BTD, ICAM1, AOC3, AHSG, CD109, DSG2, IGHA2, LCN2, PTPRJ, ANT3, LYVE1, VTN, ATRN, SERPINA1, ORM1, KLKB1, APMAP, PLXNB2, PLXDC2, IGHM, PROC, IGJ, GOLM1, A1AG2, CADM1, PGCP, FGA, PRG4                                |
| 6    | MPO, CFI, HPX, PIGR, LRG1, FN1, IGHG2, F5, AFM, HLA-A, DKFZp686N02209, ICAM2, FETUB, KNG1, FHR3, LGALS3BP, FGG, PLTP, CFH, CDH5, THBS1, AHSG, HRG, MRC2, FCGBP, NCAM1, LCN2, AOC3, SERPINA3, TNC, HP, BTD, F11, IGHM, VWF, LUM, CLU, ORM1, ANT3, CD163, MFAP4, PON1, PTPRJ, KLKB1, ATRN, APMAP, ICAM1, CD109, FGA, IGHA2, LYVE1, CTSD, MMRN1, PLXDC2, HYOU1, PROC, ITIH4, CP, DSG2, Q5JNX2, GOLM1, SERPINA6, TIMP1, VTN, IGJ, PRG4, CD44, PGCP, CADM1                                    |
| 7    | HLA-A, LGALS3BP, MPO, CFI, HPX, PIGR, LRG1, F5, MRC2, DKFZp686N02209, IGHG2, FETUB, FCGBP, FN1, PLTP, CDH5, CFH, AFM, FHR3, MFAP4, CD163, ICAM2, NCAM1, CLU, VWF, FGG, LUM, SERPINA3, HRG, PON1, KLKB1, AOC3, CTSD, DSG2, LYVE1, THBS1, HP, ICAM1, TNC, BTD, PTPRJ, APMAP, Q5JNX2, VTN, F11, IGHA2, LCN2, ITIH4, SERPINA6, PROC, ORM1, CADM1, IGHM, CP, PLXDC2, GOLM1, PLXNB2, FGA, ATRN, SERPINA1, HYOU1, PRG4, IGJ, IGFBP3, A1AG2                                                      |
| 8    | LGALS3BP, MPO, CFI, F5, HPX, LRG1, PIGR, FETUB, FN1, HLA-A, DKFZp686N02209, IGHG2, ICAM2, CFH, MRC2, FHR3, FCGBP, PLTP, AFM, AHSG, AOC3, CTSD, CD163, VWF, HRG, THBS1, CDH5, CLU, FGG, PON1, TIMP1, IGHA2, HP, MFAP4, LCN2, BTD, ICAM1, KNG1, SERPINA3, Q5JNX2, LUM, KLKB1, SERPINA7, APMAP, TNC, DSG2, PRG4, LYVE1, PTPRJ, ITIH4, SERPINA6, IGHM, ATRN, ANT3, PROC, HYOU1, VTN, CD44, F11, ORM1, PLXDC2, CD109, IGJ, FGA, PLXNB2, CADM1, SERPINA1, GOLM1, PGCP, APOB                    |
| 9    | HLA-A, HPX, LRG1, PIGR, FETUB, CFI, F5, MPO, FN1, DKFZp686N02209, LGALS3BP, IGHG2, AFM, PLTP, FHR3, CFH, MRC2, CDH5, ICAM2, THBS1, FGG, FCGBP, CLU, VWF, PON1, LUM, SERPINA3, HRG, PTPRJ, KNG1, ATRN, NCAM1, ITIH4, TNC, ICAM1, KLKB1, SERPINA7, MFAP4, HP, IGHA2, APMAP, AHSG, PLXDC2, TIMP1, AOC3, F11, VTN, FGA, SERPINA6, DSG2, ANT3, LYVE1, CD109, BTD, CTSD, LCN2, PRG4, PROC, IGHM, SERPINA1, CD163, APOB, GOLM1, HYOU1, IGJ, ORM1                                                |
| 10   | MPO, CFI, F5, HPX, LRG1, PIGR, CFH, FETUB, FHR3, LGALS3BP, AFM, FN1, IGHG2, FGG, DKFZp686N02209, FCGBP, HLA-A, MRC2, ICAM2, PLTP, KNG1, ATRN, BTD, ANT3, NCAM1, HRG, THBS1, CD163, AHSG, AOC3, SERPINA6, VWF, CDH5, TIMP1, CLU, PTPRJ, TNC, HP, KLKB1, Q5JNX2, ICAM1, SERPINA7, FGA, LCN2, CTSD, F11, MFAP4, VTN, LYVE1, PLXDC2, LUM, SERPINA3, APMAP, PRG4, ITIH4, CD109, IGHA2, DSG2, APOB, IGJ, PROC, PON1, IGHM, ORM1,                                                               |

| PLXNB2, ECM1 |                                                                                                                                                                                             |                         |                           |
|--------------|---------------------------------------------------------------------------------------------------------------------------------------------------------------------------------------------|-------------------------|---------------------------|
| <b>b</b>     | <b>Significant proteins selected into logistic regression models by stepwise selection</b>                                                                                                  |                         |                           |
| Fold         | Predictive logistic regression models                                                                                                                                                       | Training (9/10 dataset) | Validation (1/10 dataset) |
| 1            | CFH, CFI, CLU, FETUB, FGG, FHR3, HP, HRG, ICAM1, ICAM2, ITIH4, KLKB1, LUM, LYVE1, NCAM1, PIGR, PON1, PTPRJ, SERPINA1                                                                        | 0.77                    | 0.73                      |
| 2            | APOB, APMAP, CFI, CLU, ECM1, F5, FETUB, FGG, FHR3, HPX, HRG, ICAM1, ICAM2, LYVE1, NCAM1, PIGR, PTPRJ, Q5JNX2                                                                                | 0.77                    | 0.78                      |
| 3            | AOC3, APOB, BTD, CDH5, CFH, CFI, CLU, FCGBP, FETUB, FGG, FHR3, HRG, ICAM2, IGFBP3, IGJ, KNG1, LGALS3BP, LYVE1, MRC2, PIGR, PON1, PTPRJ, SERPINA3, THBS1                                     | 0.82                    | 0.65                      |
| 4            | ANT3, AOC3, APOB, CDH5, CFH, CP, F11, FCGBP, FETUB, FGG, FHR3, HP, HRG, ICAM2, IGFBP3, KLKB1, KNG1, LYVE1, MRC2, PIGR, PON1, PROC, PTPRJ, SERPINA1, TIMP1                                   | 0.75                    | 0.76                      |
| 5            | AHSG, ANT3, ATRN, CDH5, CFH, CP, FCGBP, FETUB, FGG, FHR3, FN1, HRG, ICAM1, ICAM2, IGHM, IGJ, KLKB1, LUM, LYVE1, MRC2, NCAM1, PIGR, PLXNB2, PON1, PTPRJ, SERPINA1, SERPINA3, SERPINA6, THBS1 | 0.78                    | 0.64                      |
| 6            | CFH, CLU, CP, FCGBP, FETUB, FGG, FHR3, GOLM1, HP, HRG, ICAM2, KLKB1, KNG1, LYVE1, MRC2, PIGR, PON, PTPRJ                                                                                    | 0.72                    | 0.69                      |
| 7            | CFI, CLU, CP, FETUB, FGG, HPX, ICAM1, ICAM2, IGFBP3, KLKB1, LYVE1, PIGR, PROC, PTPRJ, SERPINA1, SERPINA3                                                                                    | 0.73                    | 0.76                      |
| 8            | APOB, APMAP, CDH5, CFH, CFI, CLU, FETUB, FGG, FHR3, HLA-A, HP, HRG, ICAM1, ICAM2, KNG1, LYVE1, MPO, PIGR, PON1, PTPRJ, SERPINA1, SERPINA6, THBS1                                            | 0.75                    | 0.71                      |
| 9            | AOC3, APOB, CFH, CFI, CLU, FETUB, FHR3, HP, HPX, ICAM1, IGHG2, IGJ, LGALS3BP, LYVE1, ORM1, PIGR, PON1, PTPRJ, SERPINA1, SERPINA3, SERPINA6, VWF                                             | 0.77                    | 0.57                      |
| 10           | AOC3, APOB, BTD, CD163, CFH, CLU, ECM1, FCGBP, FETUB, FGG, FHR3, HRG, ICAM2, IGJ, ITIH4, KNG1, LGALS3BP, LYVE1, MRC2, PIGR, PON1, PTPRJ, TIMP1                                              | 0.77                    | 0.67                      |
| Consensus    | FETUB, PIGR, LYVE1, PTPRJ, FGG, FHR3, ICAM2, PON1, HRG, CLU, CFH, SERPINA1, ICAM1, CFI, APOB                                                                                                |                         |                           |

**Appendix Table S8.** Disseminated disease biomarker signature development within 10-fold CV. **a**, Differentially abundant proteins characterised as significant in the individual folds of the training dataset. **b**, Proteins selected into logistic regression models in individual folds. The consensus model contains proteins with a high frequency of occurrence in the individual folds. AUC values are reported. The median AUC presented in figure 2 is in bold. **c**, Parameters of the consensus model, the linear combination of proteins, and the selected cutoff for disseminated disease prediction.

| <b>a</b> | <b>Significant proteins for each fold (FDR&lt;0.05, fold change cut-off <math>\pm</math>1.1)</b>                                                                                                                                                    |
|----------|-----------------------------------------------------------------------------------------------------------------------------------------------------------------------------------------------------------------------------------------------------|
| Fold     | Differentially abundant proteins                                                                                                                                                                                                                    |
| 1        | AFM, ATRN, APMAP, CD109, CDH5, CFH, CFI, CP, CTSD, DKFZp686N02209, F5, FCGBP, FETUB, FGA, FGG, FHR3, FN1, HPX, HYOU1, IGFBP3, IGHG2, IGJ, KLKB1, KNG1, LRG1, MPO, MRC2, NCAM1, ORM1, PIGR, PLTP, PLXDC2, PRG4, PROC, PTPRJ, SERPINA3, TNC, VTN, VWF |
| 2        | APMAP, CADM1, CD109, CFH, CFI, DKFZp686N02209, F5, FCGBP, FETUB, FGG, FHR3, FN1, HPX, HYOU1, ICAM2, IGHG2, ITIH4, KDR, LRG1, LUM, MPO, MRC2, NCAM1, PGCP, PIGR, PLTP, PLXDC2, PON1, PTPRJ, Q5JNX2, SERPINA3, TIMP1, TNC, VTN                        |
| 3        | AFM, APMAP, CD109, CDH5, CFH, CFI, CLU, CTSD, DKFZp686N02209, F5, FCGBP, FETUB, FGA,                                                                                                                                                                |



|           | FGG, FHR3, FN1, HPX, HYOU1, ICAM1, IGHG2, IGJ, ITIH4, KDR, KLKB1, LRG1, LUM, MPO, MRC2, NCAM1, PIGR, PLTP, PLXDC2, PON1, PROC, PTPRJ, SERPINA1, SERPINA3, TIMP1, TNC                                                                                                                                                                                                                                                                                                                                                                                                                                                                                                                                                                                                                                                                                                                                                                                                                                                                                                                                                                                                                                                                                                                                                                                                                                                                                                                                                                                                                                                                                                                                                     |                         |                                       |                         |                           |   |                                                         |      |      |   |                                                   |      |             |   |                                                                                            |      |      |   |                                                                 |      |      |   |                                                                                            |      |      |   |                                                                                        |      |      |   |                                                     |      |      |   |                                                                                |      |      |   |                                                                                                                      |      |      |    |                                                        |      |      |           |                                                     |  |      |
|-----------|--------------------------------------------------------------------------------------------------------------------------------------------------------------------------------------------------------------------------------------------------------------------------------------------------------------------------------------------------------------------------------------------------------------------------------------------------------------------------------------------------------------------------------------------------------------------------------------------------------------------------------------------------------------------------------------------------------------------------------------------------------------------------------------------------------------------------------------------------------------------------------------------------------------------------------------------------------------------------------------------------------------------------------------------------------------------------------------------------------------------------------------------------------------------------------------------------------------------------------------------------------------------------------------------------------------------------------------------------------------------------------------------------------------------------------------------------------------------------------------------------------------------------------------------------------------------------------------------------------------------------------------------------------------------------------------------------------------------------|-------------------------|---------------------------------------|-------------------------|---------------------------|---|---------------------------------------------------------|------|------|---|---------------------------------------------------|------|-------------|---|--------------------------------------------------------------------------------------------|------|------|---|-----------------------------------------------------------------|------|------|---|--------------------------------------------------------------------------------------------|------|------|---|----------------------------------------------------------------------------------------|------|------|---|-----------------------------------------------------|------|------|---|--------------------------------------------------------------------------------|------|------|---|----------------------------------------------------------------------------------------------------------------------|------|------|----|--------------------------------------------------------|------|------|-----------|-----------------------------------------------------|--|------|
| 4         | AFM, APMAP, CFH, CFI, CLU, DKFZp686N02209, F5, FCGBP, FETUB, FGA, FGG, FHR3, FN1, HPX, HYOU1, IGHG2, ITIH4, KDR, KLKB1, LRG1, LUM, MPO, MRC2, NCAM1, PIGR, PLTP, PLXDC2, PON1, PROC, PTPRJ, SERPINA3, TNC, VTN                                                                                                                                                                                                                                                                                                                                                                                                                                                                                                                                                                                                                                                                                                                                                                                                                                                                                                                                                                                                                                                                                                                                                                                                                                                                                                                                                                                                                                                                                                           |                         |                                       |                         |                           |   |                                                         |      |      |   |                                                   |      |             |   |                                                                                            |      |      |   |                                                                 |      |      |   |                                                                                            |      |      |   |                                                                                        |      |      |   |                                                     |      |      |   |                                                                                |      |      |   |                                                                                                                      |      |      |    |                                                        |      |      |           |                                                     |  |      |
| 5         | AFM, APMAP, CFH, CFI, DKFZp686N02209, F5, FCGBP, FETUB, FGA, FGG, FHR3, FN1, HP, HPX, HYOU1, ICAM1, IGHG2, IGJ, ITIH4, KDR, KLKB1, LRG1, LUM, MPO, NCAM1, PIGR, PLTP, PLXDC2, PON1, PROC, PTPRJ, SERPINA1, SERPINA3, THBS1, TIMP1, TNC, VTN                                                                                                                                                                                                                                                                                                                                                                                                                                                                                                                                                                                                                                                                                                                                                                                                                                                                                                                                                                                                                                                                                                                                                                                                                                                                                                                                                                                                                                                                              |                         |                                       |                         |                           |   |                                                         |      |      |   |                                                   |      |             |   |                                                                                            |      |      |   |                                                                 |      |      |   |                                                                                            |      |      |   |                                                                                        |      |      |   |                                                     |      |      |   |                                                                                |      |      |   |                                                                                                                      |      |      |    |                                                        |      |      |           |                                                     |  |      |
| 6         | AFM, APMAP, CD109, CFH, CFI, CLU, CTSD, DKFZp686N02209, F5, FCGBP, FETUB, FGA, FGG, FHR3, FN1, HP, HPX, HYOU1, ICAM1, IGHG2, IGHM, IGJ, ITIH4, KDR, KLKB1, LRG1, LUM, MMRN1, MPO, MRC2, NCAM1, PIGR, PLTP, PLXDC2, PON1, PROC, PTPRJ, SERPINA3, THBS1, TNC, VTN                                                                                                                                                                                                                                                                                                                                                                                                                                                                                                                                                                                                                                                                                                                                                                                                                                                                                                                                                                                                                                                                                                                                                                                                                                                                                                                                                                                                                                                          |                         |                                       |                         |                           |   |                                                         |      |      |   |                                                   |      |             |   |                                                                                            |      |      |   |                                                                 |      |      |   |                                                                                            |      |      |   |                                                                                        |      |      |   |                                                     |      |      |   |                                                                                |      |      |   |                                                                                                                      |      |      |    |                                                        |      |      |           |                                                     |  |      |
| 7         | APMAP, CFH, CFI, CLU, DKFZp686N02209, F5, FCGBP, FETUB, FGA, FGG, FHR3, FN1, HPX, HYOU1, IGHG2, ITIH4, KDR, KLKB1, LRG1, LUM, MRC2, NCAM1, PIGR, PLTP, PLXDC2, PON1, PTPRJ, SERPINA3, THBS1, TNC, VTN                                                                                                                                                                                                                                                                                                                                                                                                                                                                                                                                                                                                                                                                                                                                                                                                                                                                                                                                                                                                                                                                                                                                                                                                                                                                                                                                                                                                                                                                                                                    |                         |                                       |                         |                           |   |                                                         |      |      |   |                                                   |      |             |   |                                                                                            |      |      |   |                                                                 |      |      |   |                                                                                            |      |      |   |                                                                                        |      |      |   |                                                     |      |      |   |                                                                                |      |      |   |                                                                                                                      |      |      |    |                                                        |      |      |           |                                                     |  |      |
| 8         | AFM, APMAP, CD109, CFH, CFI, DKFZp686N02209, F5, FCGBP, FETUB, FGA, FGG, FHR3, FN1, HPX, HYOU1, IGHA2, IGHG2, ITIH4, KDR, KLKB1, LRG1, LUM, MPO, MRC2, PIGR, PLTP, PLXDC2, PON1, PROC, PTPRJ, SERPINA3, THBS1, TIMP1, TNC, VTN                                                                                                                                                                                                                                                                                                                                                                                                                                                                                                                                                                                                                                                                                                                                                                                                                                                                                                                                                                                                                                                                                                                                                                                                                                                                                                                                                                                                                                                                                           |                         |                                       |                         |                           |   |                                                         |      |      |   |                                                   |      |             |   |                                                                                            |      |      |   |                                                                 |      |      |   |                                                                                            |      |      |   |                                                                                        |      |      |   |                                                     |      |      |   |                                                                                |      |      |   |                                                                                                                      |      |      |    |                                                        |      |      |           |                                                     |  |      |
| 9         | AFM, APMAP, CD109, CFH, CFI, DKFZp686N02209, F5, FCGBP, FETUB, FGA, FGG, FHR3, FN1, HLA-A, HPX, HYOU1, IGHG2, ITIH4, KDR, KLKB1, LRG1, LUM, MPO, MRC2, NCAM1, PIGR, PLTP, PLXDC2, PON1, PROC, PTPRJ, SERPINA3, THBS1, TIMP1, TNC, VTN                                                                                                                                                                                                                                                                                                                                                                                                                                                                                                                                                                                                                                                                                                                                                                                                                                                                                                                                                                                                                                                                                                                                                                                                                                                                                                                                                                                                                                                                                    |                         |                                       |                         |                           |   |                                                         |      |      |   |                                                   |      |             |   |                                                                                            |      |      |   |                                                                 |      |      |   |                                                                                            |      |      |   |                                                                                        |      |      |   |                                                     |      |      |   |                                                                                |      |      |   |                                                                                                                      |      |      |    |                                                        |      |      |           |                                                     |  |      |
| 10        | AFM, APMAP, CD109, CFH, CFI, CLU, DKFZp686N02209, F5, FCGBP, FETUB, FGA, FGG, FHR3, FN1, GOLM1, HP, HPX, HYOU1, IGHG2, ITIH4, KDR, KLKB1, LCN2, LRG1, LUM, MPO, MRC2, NCAM1, PIGR, PLTP, PLXDC2, PON1, PROC, PTPRJ, Q5JNX2, SERPINA3, THBS1, TIMP1, TNC, VTN                                                                                                                                                                                                                                                                                                                                                                                                                                                                                                                                                                                                                                                                                                                                                                                                                                                                                                                                                                                                                                                                                                                                                                                                                                                                                                                                                                                                                                                             |                         |                                       |                         |                           |   |                                                         |      |      |   |                                                   |      |             |   |                                                                                            |      |      |   |                                                                 |      |      |   |                                                                                            |      |      |   |                                                                                        |      |      |   |                                                     |      |      |   |                                                                                |      |      |   |                                                                                                                      |      |      |    |                                                        |      |      |           |                                                     |  |      |
| <b>b</b>  | <b>Significant proteins selected into logistic regression models by stepwise selection</b>                                                                                                                                                                                                                                                                                                                                                                                                                                                                                                                                                                                                                                                                                                                                                                                                                                                                                                                                                                                                                                                                                                                                                                                                                                                                                                                                                                                                                                                                                                                                                                                                                               |                         |                                       |                         |                           |   |                                                         |      |      |   |                                                   |      |             |   |                                                                                            |      |      |   |                                                                 |      |      |   |                                                                                            |      |      |   |                                                                                        |      |      |   |                                                     |      |      |   |                                                                                |      |      |   |                                                                                                                      |      |      |    |                                                        |      |      |           |                                                     |  |      |
|           | <table border="1"> <thead> <tr> <th>Fold</th> <th>Predictive logistic regression models</th> <th>Training (9/10 dataset)</th> <th>Validation (1/10 dataset)</th> </tr> </thead> <tbody> <tr> <td>1</td> <td>CFH, F5, FETUB, IGHG2, IGJ, KNG1, MPO, PIGR, PTPRJ, VTN</td> <td>0.92</td> <td>0.67</td> </tr> <tr> <td>2</td> <td>CFH, DKFZp686N02209, FGG, IGHG2, PIGR, PTPRJ, VTN</td> <td>0.90</td> <td><b>0.82</b></td> </tr> <tr> <td>3</td> <td>CDH5, CFH, CFI, CLU, DKFZp686N02209, F5, FGG, IGJ, ITIH4, LRG1, MPO, PIGR, PTPRJ, SERPINA1</td> <td>0.92</td> <td>0.85</td> </tr> <tr> <td>4</td> <td>CFH, CLU, F5, FGG, ITIH4, NCAM1, PIGR, PLXDC2, PON1, PTPRJ, VTN</td> <td>0.91</td> <td>0.92</td> </tr> <tr> <td>5</td> <td>AFM, CFH, DKFZp686N02209, F5, FGG, ICAM1, ITIH4, KLKB1, PIGR, PON1, PTPRJ, SERPINA1, THBS1</td> <td>0.92</td> <td>0.97</td> </tr> <tr> <td>6</td> <td>CFH, CLU, F5, FETUB, FGG, IGHG2, IGHM, IGJ, ITIH4, MMRN1, MPO, NCAM1, PIGR, PTPRJ, VTN</td> <td>0.94</td> <td>0.80</td> </tr> <tr> <td>7</td> <td>F5, FETUB, FGA, FGG, IGHG2, NCAM1, PIGR, PTPRJ, VTN</td> <td>0.92</td> <td>0.71</td> </tr> <tr> <td>8</td> <td>AFM, CFH, DKFZp686N02209, F5, FETUB, FGG, MPO, PIGR, PLXDC2, PTPRJ, THBS1, VTN</td> <td>0.91</td> <td>0.92</td> </tr> <tr> <td>9</td> <td>CFH, CFI, F5, FETUB, FGA, FGG, FHR3, HLA-A, IGHG2, ITIH4, KDR, KLKB1, LUM, NCAM1, PIGR, PLTP, PTPRJ, SERPINA3, THBS1</td> <td>0.93</td> <td>0.63</td> </tr> <tr> <td>10</td> <td>AFM, CFH, F5, FGG, IGHG2, LCN2, PIGR, PLTP, PTPRJ, VTN</td> <td>0.91</td> <td>0.75</td> </tr> <tr> <td>Consensus</td> <td>PTPRJ, PIGR, CFH, F5, FGG, VTN, IGHG2, ITIH4, FETUB</td> <td></td> <td>0.90</td> </tr> </tbody> </table> | Fold                    | Predictive logistic regression models | Training (9/10 dataset) | Validation (1/10 dataset) | 1 | CFH, F5, FETUB, IGHG2, IGJ, KNG1, MPO, PIGR, PTPRJ, VTN | 0.92 | 0.67 | 2 | CFH, DKFZp686N02209, FGG, IGHG2, PIGR, PTPRJ, VTN | 0.90 | <b>0.82</b> | 3 | CDH5, CFH, CFI, CLU, DKFZp686N02209, F5, FGG, IGJ, ITIH4, LRG1, MPO, PIGR, PTPRJ, SERPINA1 | 0.92 | 0.85 | 4 | CFH, CLU, F5, FGG, ITIH4, NCAM1, PIGR, PLXDC2, PON1, PTPRJ, VTN | 0.91 | 0.92 | 5 | AFM, CFH, DKFZp686N02209, F5, FGG, ICAM1, ITIH4, KLKB1, PIGR, PON1, PTPRJ, SERPINA1, THBS1 | 0.92 | 0.97 | 6 | CFH, CLU, F5, FETUB, FGG, IGHG2, IGHM, IGJ, ITIH4, MMRN1, MPO, NCAM1, PIGR, PTPRJ, VTN | 0.94 | 0.80 | 7 | F5, FETUB, FGA, FGG, IGHG2, NCAM1, PIGR, PTPRJ, VTN | 0.92 | 0.71 | 8 | AFM, CFH, DKFZp686N02209, F5, FETUB, FGG, MPO, PIGR, PLXDC2, PTPRJ, THBS1, VTN | 0.91 | 0.92 | 9 | CFH, CFI, F5, FETUB, FGA, FGG, FHR3, HLA-A, IGHG2, ITIH4, KDR, KLKB1, LUM, NCAM1, PIGR, PLTP, PTPRJ, SERPINA3, THBS1 | 0.93 | 0.63 | 10 | AFM, CFH, F5, FGG, IGHG2, LCN2, PIGR, PLTP, PTPRJ, VTN | 0.91 | 0.75 | Consensus | PTPRJ, PIGR, CFH, F5, FGG, VTN, IGHG2, ITIH4, FETUB |  | 0.90 |
| Fold      | Predictive logistic regression models                                                                                                                                                                                                                                                                                                                                                                                                                                                                                                                                                                                                                                                                                                                                                                                                                                                                                                                                                                                                                                                                                                                                                                                                                                                                                                                                                                                                                                                                                                                                                                                                                                                                                    | Training (9/10 dataset) | Validation (1/10 dataset)             |                         |                           |   |                                                         |      |      |   |                                                   |      |             |   |                                                                                            |      |      |   |                                                                 |      |      |   |                                                                                            |      |      |   |                                                                                        |      |      |   |                                                     |      |      |   |                                                                                |      |      |   |                                                                                                                      |      |      |    |                                                        |      |      |           |                                                     |  |      |
| 1         | CFH, F5, FETUB, IGHG2, IGJ, KNG1, MPO, PIGR, PTPRJ, VTN                                                                                                                                                                                                                                                                                                                                                                                                                                                                                                                                                                                                                                                                                                                                                                                                                                                                                                                                                                                                                                                                                                                                                                                                                                                                                                                                                                                                                                                                                                                                                                                                                                                                  | 0.92                    | 0.67                                  |                         |                           |   |                                                         |      |      |   |                                                   |      |             |   |                                                                                            |      |      |   |                                                                 |      |      |   |                                                                                            |      |      |   |                                                                                        |      |      |   |                                                     |      |      |   |                                                                                |      |      |   |                                                                                                                      |      |      |    |                                                        |      |      |           |                                                     |  |      |
| 2         | CFH, DKFZp686N02209, FGG, IGHG2, PIGR, PTPRJ, VTN                                                                                                                                                                                                                                                                                                                                                                                                                                                                                                                                                                                                                                                                                                                                                                                                                                                                                                                                                                                                                                                                                                                                                                                                                                                                                                                                                                                                                                                                                                                                                                                                                                                                        | 0.90                    | <b>0.82</b>                           |                         |                           |   |                                                         |      |      |   |                                                   |      |             |   |                                                                                            |      |      |   |                                                                 |      |      |   |                                                                                            |      |      |   |                                                                                        |      |      |   |                                                     |      |      |   |                                                                                |      |      |   |                                                                                                                      |      |      |    |                                                        |      |      |           |                                                     |  |      |
| 3         | CDH5, CFH, CFI, CLU, DKFZp686N02209, F5, FGG, IGJ, ITIH4, LRG1, MPO, PIGR, PTPRJ, SERPINA1                                                                                                                                                                                                                                                                                                                                                                                                                                                                                                                                                                                                                                                                                                                                                                                                                                                                                                                                                                                                                                                                                                                                                                                                                                                                                                                                                                                                                                                                                                                                                                                                                               | 0.92                    | 0.85                                  |                         |                           |   |                                                         |      |      |   |                                                   |      |             |   |                                                                                            |      |      |   |                                                                 |      |      |   |                                                                                            |      |      |   |                                                                                        |      |      |   |                                                     |      |      |   |                                                                                |      |      |   |                                                                                                                      |      |      |    |                                                        |      |      |           |                                                     |  |      |
| 4         | CFH, CLU, F5, FGG, ITIH4, NCAM1, PIGR, PLXDC2, PON1, PTPRJ, VTN                                                                                                                                                                                                                                                                                                                                                                                                                                                                                                                                                                                                                                                                                                                                                                                                                                                                                                                                                                                                                                                                                                                                                                                                                                                                                                                                                                                                                                                                                                                                                                                                                                                          | 0.91                    | 0.92                                  |                         |                           |   |                                                         |      |      |   |                                                   |      |             |   |                                                                                            |      |      |   |                                                                 |      |      |   |                                                                                            |      |      |   |                                                                                        |      |      |   |                                                     |      |      |   |                                                                                |      |      |   |                                                                                                                      |      |      |    |                                                        |      |      |           |                                                     |  |      |
| 5         | AFM, CFH, DKFZp686N02209, F5, FGG, ICAM1, ITIH4, KLKB1, PIGR, PON1, PTPRJ, SERPINA1, THBS1                                                                                                                                                                                                                                                                                                                                                                                                                                                                                                                                                                                                                                                                                                                                                                                                                                                                                                                                                                                                                                                                                                                                                                                                                                                                                                                                                                                                                                                                                                                                                                                                                               | 0.92                    | 0.97                                  |                         |                           |   |                                                         |      |      |   |                                                   |      |             |   |                                                                                            |      |      |   |                                                                 |      |      |   |                                                                                            |      |      |   |                                                                                        |      |      |   |                                                     |      |      |   |                                                                                |      |      |   |                                                                                                                      |      |      |    |                                                        |      |      |           |                                                     |  |      |
| 6         | CFH, CLU, F5, FETUB, FGG, IGHG2, IGHM, IGJ, ITIH4, MMRN1, MPO, NCAM1, PIGR, PTPRJ, VTN                                                                                                                                                                                                                                                                                                                                                                                                                                                                                                                                                                                                                                                                                                                                                                                                                                                                                                                                                                                                                                                                                                                                                                                                                                                                                                                                                                                                                                                                                                                                                                                                                                   | 0.94                    | 0.80                                  |                         |                           |   |                                                         |      |      |   |                                                   |      |             |   |                                                                                            |      |      |   |                                                                 |      |      |   |                                                                                            |      |      |   |                                                                                        |      |      |   |                                                     |      |      |   |                                                                                |      |      |   |                                                                                                                      |      |      |    |                                                        |      |      |           |                                                     |  |      |
| 7         | F5, FETUB, FGA, FGG, IGHG2, NCAM1, PIGR, PTPRJ, VTN                                                                                                                                                                                                                                                                                                                                                                                                                                                                                                                                                                                                                                                                                                                                                                                                                                                                                                                                                                                                                                                                                                                                                                                                                                                                                                                                                                                                                                                                                                                                                                                                                                                                      | 0.92                    | 0.71                                  |                         |                           |   |                                                         |      |      |   |                                                   |      |             |   |                                                                                            |      |      |   |                                                                 |      |      |   |                                                                                            |      |      |   |                                                                                        |      |      |   |                                                     |      |      |   |                                                                                |      |      |   |                                                                                                                      |      |      |    |                                                        |      |      |           |                                                     |  |      |
| 8         | AFM, CFH, DKFZp686N02209, F5, FETUB, FGG, MPO, PIGR, PLXDC2, PTPRJ, THBS1, VTN                                                                                                                                                                                                                                                                                                                                                                                                                                                                                                                                                                                                                                                                                                                                                                                                                                                                                                                                                                                                                                                                                                                                                                                                                                                                                                                                                                                                                                                                                                                                                                                                                                           | 0.91                    | 0.92                                  |                         |                           |   |                                                         |      |      |   |                                                   |      |             |   |                                                                                            |      |      |   |                                                                 |      |      |   |                                                                                            |      |      |   |                                                                                        |      |      |   |                                                     |      |      |   |                                                                                |      |      |   |                                                                                                                      |      |      |    |                                                        |      |      |           |                                                     |  |      |
| 9         | CFH, CFI, F5, FETUB, FGA, FGG, FHR3, HLA-A, IGHG2, ITIH4, KDR, KLKB1, LUM, NCAM1, PIGR, PLTP, PTPRJ, SERPINA3, THBS1                                                                                                                                                                                                                                                                                                                                                                                                                                                                                                                                                                                                                                                                                                                                                                                                                                                                                                                                                                                                                                                                                                                                                                                                                                                                                                                                                                                                                                                                                                                                                                                                     | 0.93                    | 0.63                                  |                         |                           |   |                                                         |      |      |   |                                                   |      |             |   |                                                                                            |      |      |   |                                                                 |      |      |   |                                                                                            |      |      |   |                                                                                        |      |      |   |                                                     |      |      |   |                                                                                |      |      |   |                                                                                                                      |      |      |    |                                                        |      |      |           |                                                     |  |      |
| 10        | AFM, CFH, F5, FGG, IGHG2, LCN2, PIGR, PLTP, PTPRJ, VTN                                                                                                                                                                                                                                                                                                                                                                                                                                                                                                                                                                                                                                                                                                                                                                                                                                                                                                                                                                                                                                                                                                                                                                                                                                                                                                                                                                                                                                                                                                                                                                                                                                                                   | 0.91                    | 0.75                                  |                         |                           |   |                                                         |      |      |   |                                                   |      |             |   |                                                                                            |      |      |   |                                                                 |      |      |   |                                                                                            |      |      |   |                                                                                        |      |      |   |                                                     |      |      |   |                                                                                |      |      |   |                                                                                                                      |      |      |    |                                                        |      |      |           |                                                     |  |      |
| Consensus | PTPRJ, PIGR, CFH, F5, FGG, VTN, IGHG2, ITIH4, FETUB                                                                                                                                                                                                                                                                                                                                                                                                                                                                                                                                                                                                                                                                                                                                                                                                                                                                                                                                                                                                                                                                                                                                                                                                                                                                                                                                                                                                                                                                                                                                                                                                                                                                      |                         | 0.90                                  |                         |                           |   |                                                         |      |      |   |                                                   |      |             |   |                                                                                            |      |      |   |                                                                 |      |      |   |                                                                                            |      |      |   |                                                                                        |      |      |   |                                                     |      |      |   |                                                                                |      |      |   |                                                                                                                      |      |      |    |                                                        |      |      |           |                                                     |  |      |
| <b>c</b>  | <b>Consensus model</b> where stage 4=1, stages 1+2+3=0                                                                                                                                                                                                                                                                                                                                                                                                                                                                                                                                                                                                                                                                                                                                                                                                                                                                                                                                                                                                                                                                                                                                                                                                                                                                                                                                                                                                                                                                                                                                                                                                                                                                   |                         |                                       |                         |                           |   |                                                         |      |      |   |                                                   |      |             |   |                                                                                            |      |      |   |                                                                 |      |      |   |                                                                                            |      |      |   |                                                                                        |      |      |   |                                                     |      |      |   |                                                                                |      |      |   |                                                                                                                      |      |      |    |                                                        |      |      |           |                                                     |  |      |
| Model     | -27.9437633 - 1.1032118*PTPRJ + 1.0899420*PIGR + 0.7643993*CFH + 0.3666503*F5 - 1.0169896*FGG - 1.0493068*VTN + 0.7813780*IGHG2 + 0.5811620*ITIH4 + 0.6886607*FETUB                                                                                                                                                                                                                                                                                                                                                                                                                                                                                                                                                                                                                                                                                                                                                                                                                                                                                                                                                                                                                                                                                                                                                                                                                                                                                                                                                                                                                                                                                                                                                      |                         |                                       |                         |                           |   |                                                         |      |      |   |                                                   |      |             |   |                                                                                            |      |      |   |                                                                 |      |      |   |                                                                                            |      |      |   |                                                                                        |      |      |   |                                                     |      |      |   |                                                                                |      |      |   |                                                                                                                      |      |      |    |                                                        |      |      |           |                                                     |  |      |
| Cutoff    | 0.256                                                                                                                                                                                                                                                                                                                                                                                                                                                                                                                                                                                                                                                                                                                                                                                                                                                                                                                                                                                                                                                                                                                                                                                                                                                                                                                                                                                                                                                                                                                                                                                                                                                                                                                    |                         |                                       |                         |                           |   |                                                         |      |      |   |                                                   |      |             |   |                                                                                            |      |      |   |                                                                 |      |      |   |                                                                                            |      |      |   |                                                                                        |      |      |   |                                                     |      |      |   |                                                                                |      |      |   |                                                                                                                      |      |      |    |                                                        |      |      |           |                                                     |  |      |

**Appendix Table S9.** Reproducibility assessment of the disseminated disease biomarker signature within 8-fold CV. **a**, Differentially abundant proteins characterised as significant in the individual folds of the training dataset. **b**, Proteins selected into logistic regression models in individual folds. The consensus model contains proteins with a high frequency of occurrence in the individual folds. AUC values are reported.

| <b>a</b>                                                                                          |                                                                                                                                                                                                                                                                                          |                        |                          |
|---------------------------------------------------------------------------------------------------|------------------------------------------------------------------------------------------------------------------------------------------------------------------------------------------------------------------------------------------------------------------------------------------|------------------------|--------------------------|
| <b>Significant proteins for each fold (FDR&lt;0.05, fold change cut-off <math>\pm 1.1</math>)</b> |                                                                                                                                                                                                                                                                                          |                        |                          |
| Fold                                                                                              | Differentially abundant proteins                                                                                                                                                                                                                                                         |                        |                          |
| 1                                                                                                 | APMAP, CD109, CFH, CFI, CLU, DKFZp686N02209, F5, FCGBP, FETUB, FGA, FGG, FHR3, FN1, HPX, ICAM1, IGFBP3, IGHG2, IGJ, LRG1, LUM, MPO, MRC2, NCAM1, PIGR, PLTP, PLXDC2, PON1, PROC, PTPRJ, Q5JNX2, SERPINA3, THBS1, TNC, VTN, VWF                                                           |                        |                          |
| 2                                                                                                 | AFM, ATRN, APMAP, CD109, CFH, CFI, DKFZp686N02209, F5, FCGBP, FETUB, FGA, FGG, FHR3, FN1, GOLM1, HP, HPX, HYOU1, IGFBP3, IGHG2, ITIH4, KDR, LRG1, LUM, MPO, MRC2, NCAM1, PIGR, PLTP, PLXDC2, PON1, PROC, PTPRJ, SERPINA3, THBS1, TIMP1, TNC, VTN                                         |                        |                          |
| 3                                                                                                 | AFM, AOC3, ATRN, APMAP, CD109, CFH, CFI, DKFZp686N02209, F5, FCGBP, FETUB, FGA, FGG, FHR3, FN1, HPX, HYOU1, IGFBP3, IGHG2, IGHM, IGJ, KDR, LRG1, MRC2, NCAM1, PIGR, PLTP, PLXDC2, PRG4, PROC, PTPRJ, SERPINA3, TNC, VTN                                                                  |                        |                          |
| 4                                                                                                 | AFM, APMAP, CD163, CDH5, CFH, CFI, DKFZp686N02209, F5, FCGBP, FETUB, FGA, FGG, FHR3, FN1, HP, HPX, HYOU1, IGFBP3, IGHA2, IGHG2, ITIH4, KDR, LRG1, LUM, MMRN1, MPO, MRC2, NCAM1, PGCP, PIGR, PLTP, PLXDC2, PON1, PROC, PTPRJ, SERPINA3, THBS1, TIMP1, TNC, VTN                            |                        |                          |
| 5                                                                                                 | AFM, AOC3, APMAP, CD109, CFH, CFI, CLU, DKFZp686N02209, F5, FCGBP, FETUB, FGA, FGG, FHR3, FN1, HP, HPX, HYOU1, ICAM1, IGFBP3, IGHG2, ITIH4, KDR, LGALS3BP, LRG1, LUM, MPO, NCAM1, PIGR, PLTP, PLXDC2, PON1, PROC, PTPRJ, SERPINA1, SERPINA3, THBS1, TIMP1, TNC, VTN                      |                        |                          |
| 6                                                                                                 | A1AG2, APMAP, CADM1, CD109, CFH, CFI, CLU, CTSD, DKFZp686N02209, F5, FCGBP, FETUB, FGA, FGG, FHR3, FN1, HPX, HYOU1, ICAM1, IGFBP3, IGHG2, IGJ, ITIH4, KDR, LGALS3BP, LRG1, LUM, LYVE1, MPO, MRC2, PIGR, PLTP, PLXDC2, PON1, PROC, PTPRJ, SERPINA3, SERPINA7, THBS1, TIMP1, TNC, VTN, VWF |                        |                          |
| 7                                                                                                 | AFM, APMAP, CFH, CFI, CLU, DKFZp686N02209, F5, FCGBP, FETUB, FGA, FGG, FHR3, FN1, HPX, HYOU1, IGFBP3, IGHG2, ITIH4, KDR, LRG1, LUM, MPO, MRC2, NCAM1, PIGR, PLTP, PLXDC2, PON1, PROC, PTPRJ, SERPINA3, TIMP1, TNC, VTN                                                                   |                        |                          |
| 8                                                                                                 | AFM, APMAP, CD109, CFH, CFI, DKFZp686N02209, F5, FCGBP, FETUB, FGA, FGG, FHR3, FN1, HPX, HYOU1, IGFBP3, IGHG2, ITIH4, KDR, LRG1, LUM, MPO, MRC2, PIGR, PLTP, PLXDC2, PON1, PROC, PTPRJ, Q6N091, SERPINA3, TNC, VTN                                                                       |                        |                          |
| <b>b</b>                                                                                          |                                                                                                                                                                                                                                                                                          |                        |                          |
| <b>Significant proteins selected into logistic regression models by stepwise selection</b>        |                                                                                                                                                                                                                                                                                          |                        |                          |
| Fold                                                                                              | Predictive logistic regression models                                                                                                                                                                                                                                                    | Training (7/8 dataset) | Validation (1/8 dataset) |
| 1                                                                                                 | CFH, F5, FETUB, FGG, IGHG2, IGJ, MPO, NCAM1, PIGR, PTPRJ, VTN                                                                                                                                                                                                                            | 0.92                   | 0.84                     |
| 2                                                                                                 | AFM, CFH, FETUB, FGG, IGHG2, ITIH4, PIGR, PLXDC2, PTPRJ, VTN                                                                                                                                                                                                                             | 0.90                   | 0.91                     |
| 3                                                                                                 | AFM, CFH, F5, FETUB, FGG, IGHG2, IGJ, PIGR, PTPRJ, VTN                                                                                                                                                                                                                                   | 0.92                   | 0.81                     |
| 4                                                                                                 | AFM, CDH5, CFH, F5, FGA, FGG, IGHG2, MMRN1, NCAM1, PIGR, PTPRJ, VTN                                                                                                                                                                                                                      | 0.91                   | 0.67                     |
| 5                                                                                                 | CLU, FETUB, HPX, ITIH4, NCAM1, PIGR, PLTP, PTPRJ, SERPINA1, VTN                                                                                                                                                                                                                          | 0.92                   | 0.58                     |
| 6                                                                                                 | APMAP, CFH, DKFZp686N02209, F5, FGG, IGHG2, IGJ, LYVE1, PIGR, PTPRJ, THBS1, VTN                                                                                                                                                                                                          | 0.95                   | 0.61                     |
| 7                                                                                                 | CFH, CFI, F5, FETUB, FGG, IGHG2, NCAM1, PIGR, PTPRJ, VTN                                                                                                                                                                                                                                 | 0.92                   | 0.78                     |
| 8                                                                                                 | AFM, CFH, FGG, IGHG2, PIGR, PON1, PTPRJ, VTN                                                                                                                                                                                                                                             | 0.89                   | 0.93                     |
| Consensus                                                                                         | AFM, NCAM1, F5, FETUB, CFH, FGG, IGHG2, PIGR, PTPRJ, VTN                                                                                                                                                                                                                                 |                        | 0.91                     |

**Appendix Table S10.** Forced selection of clinical factors (i.e. age, gender, and stage) into predictive biomarker signatures for **a**, regional localization, and **b**, TNM metastasis status. Proteins selected into logistic regression models in individual folds and the corresponding AUC values are reported. The consensus model

contains proteins with a high frequency of occurrence in the individual folds.

| <b>a</b>                                                                                     |                                                                                                                            |                         |                           |
|----------------------------------------------------------------------------------------------|----------------------------------------------------------------------------------------------------------------------------|-------------------------|---------------------------|
| <b>Significant proteins selected into regional localization models by stepwise selection</b> |                                                                                                                            |                         |                           |
| Fold                                                                                         | Predictive logistic regression models                                                                                      | Training (9/10 dataset) | Validation (1/10 dataset) |
| 1                                                                                            | Age, Gender, Stage, CADM1, FN1, HRG, HYOU1, LGALS3BP, LRG1, MRC2, TIMP1, VTN                                               | 0.81                    | 0.52                      |
| 2                                                                                            | Age, Gender, Stage, CADM1, FN1, HYOU1, LGALS3BP, VTN                                                                       | 0.78                    | 0.67                      |
| 3                                                                                            | Age, Gender, Stage, CADM1, FN1, HYOU1, LGALS3BP, VTN                                                                       | 0.76                    | 0.77                      |
| 4                                                                                            | Age, Gender, Stage, CADM1, CD109, LGALS3BP, LRG1                                                                           | 0.79                    | 0.67                      |
| 5                                                                                            | Age, Gender, Stage, CADM1, CD109, HYOU1, LGALS3BP, LRG1, TIMP1                                                             | 0.82                    | 0.56                      |
| 6                                                                                            | Age, Gender, Stage, CADM1, FN1, HYOU1, LGALS3BP, MRC2, VTN                                                                 | 0.79                    | 0.49                      |
| 7                                                                                            | Age, Gender, Stage, CADM1, CD109, HYOU1, LGALS3BP, LRG1, TIMP1                                                             | 0.79                    | 0.79                      |
| 8                                                                                            | Age, Gender, Stage, CADM1, FN1, HYOU1, LGALS3BP, VTN                                                                       | 0.77                    | 0.74                      |
| 9                                                                                            | Age, Gender, Stage, CADM1, FN1, HP, HYOU1, LGALS3BP, LRG1, MMRN1, VTN                                                      | 0.79                    | 0.81                      |
| 10                                                                                           | Age, Gender, Stage, CADM1, FN1, HYOU1, LGALS3BP                                                                            | 0.76                    | 0.64                      |
| Consensus                                                                                    | Age, Gender, Stage, LGALS3BP, CADM1, HYOU1, FN1, VTN, LRG1                                                                 |                         | 0.77                      |
| <b>b</b>                                                                                     |                                                                                                                            |                         |                           |
| <b>Significant proteins selected into TNM metastasis status models by stepwise selection</b> |                                                                                                                            |                         |                           |
| Fold                                                                                         | Predictive logistic regression models                                                                                      | Training (9/10 dataset) | Validation (1/10 dataset) |
| 1                                                                                            | Age, Gender, APMAP, CFH, F5, FETUB, FGG, IGHG2, IGJ, KNG1, MPO, NCAM1, PIGR, PLTP, PLXDC2, PRG4, PTPRJ, VTN                | 0.94                    | 0.64                      |
| 2                                                                                            | Age, Gender, CFH, CFI, DKFZp686N02209, F5, FGG, IGHG2, MRC2, NCAM1, PIGR, PTPRJ, Q5JNX2, VTN                               | 0.92                    | 0.77                      |
| 3                                                                                            | Age, Gender, CDH5, CFH, CFI, CLU, DKFZp686N02209, F5, FGA, FGG, IGHG2, IGJ, ITIH4, KLKB1, LRG1, MPO, PIGR, PTPRJ, SERPINA1 | 0.93                    | 0.83                      |
| 4                                                                                            | Age, Gender, AFM, CFH, F5, FGG, IGHG2, NCAM1, PIGR, PON1, PTPRJ, VTN                                                       | 0.90                    | 0.95                      |
| 5                                                                                            | Age, Gender, AFM, CFH, DKFZp686N02209, F5, FGA, FGG, ICAM1, IGHG2, KLKB1, MPO, PIGR, PLTP, PTPRJ, SERPINA1                 | 0.92                    | 0.92                      |
| 6                                                                                            | Age, Gender, AFM, CFH, CLU, F5, FETUB, FGG, IGHG2, IGJ, ITIH4, MMRN1, MPO, PIGR, PTPRJ, SERPINA3, VTN                      | 0.94                    | 0.79                      |
| 7                                                                                            | Age, Gender, F5, FETUB, FGA, FGG, IGHG2, NCAM1, PIGR, PTPRJ, VTN                                                           | 0.92                    | 0.69                      |
| 8                                                                                            | Age, Gender, AFM, CFH, F5, FETUB, FGG, IGHG2, MPO, PIGR, PLXDC2, PON1, PTPRJ, VTN                                          | 0.91                    | 0.88                      |
| 9                                                                                            | Age, Gender, AFM, CFH, DKFZp686N02209, F5, FGA, FGG, HLA-A, IGHG2, KLKB1, LUM, PIGR, PLTP, PTPRJ, SERPINA3                 | 0.93                    | 0.69                      |
| 10                                                                                           | Age, Gender, AFM, CFH, F5, FGG, IGHG2, LCN2, PIGR, PLTP, PTPRJ, VTN                                                        | 0.91                    | 0.77                      |
| Consensus                                                                                    | Age, Gender, PTPRJ, PIGR, IGHG2, FGG, F5, CFH, VTN, AFM, MPO                                                               |                         | 0.90                      |

**Appendix Table S11.** The performance of individual outcome signature proteins on the protein or transcript levels. The predictive ability of each predictor at a time was assessed within cross validation (CV) **a**, in the SRM proteomic data set associated with overall survival (OS), **b**, in the GSE17536 transcriptomic data set associated with OS, and **c**, in the GSE14333 transcriptomic data set associated with disease-free survival (DFS). AUCfull denotes an upper level of performance reported for the predictive model on the full data set. AUCmedian represents an unbiased performance derived from the pseudomedian fold of the cross-validation.

|                    | <b>a</b>                                                      | <b>b</b>                                                          | <b>c</b>                                                            |
|--------------------|---------------------------------------------------------------|-------------------------------------------------------------------|---------------------------------------------------------------------|
| Signature proteins | <b>SRM data set<br/>OS, 10-fold CV<br/>AUCfull, AUCmedian</b> | <b>GSE17536 data set<br/>OS, 5-fold CV<br/>AUCfull, AUCmedian</b> | <b>GSE14333 data set<br/>DFS, 10-fold CV<br/>AUCfull, AUCmedian</b> |
| HLA-A              | 0.55, 0.57                                                    | 0.59, 0.6                                                         | 0.51, 0.5                                                           |
| CFH                | 0.56, 0.61                                                    | 0.62, 0.67                                                        | 0.68, 0.77                                                          |
| CD44               | 0.64, 0.67                                                    | 0.56, 0.60                                                        | 0.52, 0.5                                                           |
| PTPRJ              | 0.62, 0.71                                                    | 0.59, 0.55                                                        | 0.53, 0.58                                                          |
| HP                 | 0.59, 0.58                                                    | 0.58, 0.61                                                        | 0.51, 0.58                                                          |
| CDH5               | 0.52, 0.56                                                    | 0.59, 0.59                                                        | 0.58, 0.63                                                          |

**Appendix Table S12.** Classification of colon cancer subtypes (CCSs) based on the outcome signature proteins within 10-fold cross-validation of the GSE33113 data set.

|        |                           | subgroups from paper |      |      |      |
|--------|---------------------------|----------------------|------|------|------|
|        |                           |                      | CCS1 | CCS2 | CCS3 |
| fold1  | predicted by our proteins | CCS1                 | 4    | 1    | 0    |
|        |                           | CCS2                 | 0    | 1    | 0    |
|        |                           | CCS3                 | 1    | 1    | 3    |
| fold2  | predicted by our proteins | CCS1                 | 3    | 2    | 0    |
|        |                           | CCS2                 | 2    | 1    | 0    |
|        |                           | CCS3                 | 0    | 0    | 3    |
| fold3  | predicted by our proteins | CCS1                 | 3    | 2    | 0    |
|        |                           | CCS2                 | 2    | 0    | 1    |
|        |                           | CCS3                 | 0    | 0    | 2    |
| fold4  | predicted by our proteins | CCS1                 | 4    | 1    | 0    |
|        |                           | CCS2                 | 0    | 0    | 0    |
|        |                           | CCS3                 | 1    | 1    | 3    |
| fold5  | predicted by our proteins | CCS1                 | 3    | 1    | 0    |
|        |                           | CCS2                 | 1    | 1    | 0    |
|        |                           | CCS3                 | 0    | 0    | 2    |
| fold6  | predicted by our proteins | CCS1                 | 3    | 1    | 1    |
|        |                           | CCS2                 | 1    | 1    | 0    |
|        |                           | CCS3                 | 0    | 0    | 1    |
| fold7  | predicted by our proteins | CCS1                 | 3    | 1    | 0    |
|        |                           | CCS2                 | 1    | 0    | 0    |
|        |                           | CCS3                 | 0    | 1    | 2    |
| fold8  | predicted by our proteins | CCS1                 | 3    | 1    | 1    |
|        |                           | CCS2                 | 1    | 1    | 0    |
|        |                           | CCS3                 | 0    | 0    | 1    |
| fold9  | predicted by our proteins | CCS1                 | 3    | 2    | 1    |
|        |                           | CCS2                 | 1    | 0    | 0    |
|        |                           | CCS3                 | 0    | 0    | 1    |
| fold10 | predicted by our proteins | CCS1                 | 4    | 1    | 1    |
|        |                           | CCS2                 | 0    | 1    | 0    |
|        |                           | CCS3                 | 0    | 0    | 1    |

**Appendix Table S13.** Classification of the five cellular phenotype subtypes based on the outcome signature proteins within **a**, 5-fold cross-validation of the GSE13294 data set, and **b**, 10-fold cross-validation of the GSE14333 data set.

| <b>a</b> |                           |              | subgroups from paper |             |              |           |    |
|----------|---------------------------|--------------|----------------------|-------------|--------------|-----------|----|
|          |                           |              | enterocyte           | goblet-like | inflammatory | stem-like | TA |
| fold1    | predicted by our proteins | enterocyte   | 0                    | 0           | 0            | 1         | 0  |
|          |                           | goblet-like  | 0                    | 3           | 1            | 2         | 1  |
|          |                           | inflammatory | 2                    | 2           | 2            | 0         | 3  |
|          |                           | stem-like    | 1                    | 0           | 3            | 1         | 0  |
|          |                           | TA           | 2                    | 0           | 1            | 0         | 4  |
| fold2    | predicted by our proteins | enterocyte   | 1                    | 1           | 1            | 1         | 0  |
|          |                           | goblet-like  | 0                    | 0           | 0            | 0         | 1  |
|          |                           | inflammatory | 3                    | 2           | 3            | 2         | 1  |
|          |                           | stem-like    | 0                    | 0           | 0            | 1         | 0  |
|          |                           | TA           | 1                    | 1           | 3            | 0         | 5  |
| fold3    | predicted by our proteins | enterocyte   | 1                    | 1           | 0            | 2         | 2  |
|          |                           | goblet-like  | 1                    | 0           | 0            | 0         | 1  |
|          |                           | inflammatory | 1                    | 1           | 3            | 1         | 0  |
|          |                           | stem-like    | 2                    | 0           | 2            | 1         | 0  |
|          |                           | TA           | 0                    | 2           | 2            | 0         | 4  |
| fold4    | predicted by our proteins | enterocyte   | 2                    | 0           | 3            | 2         | 1  |
|          |                           | Goblet-like  | 0                    | 1           | 0            | 0         | 1  |
|          |                           | Inflammatory | 0                    | 0           | 1            | 1         | 1  |
|          |                           | Stem-like    | 0                    | 1           | 2            | 1         | 0  |
|          |                           | TA           | 3                    | 2           | 1            | 0         | 4  |
| fold5    | predicted by our proteins | enterocyte   | 2                    | 0           | 1            | 0         | 0  |
|          |                           | Goblet-like  | 0                    | 1           | 0            | 0         | 2  |
|          |                           | Inflammatory | 1                    | 1           | 5            | 4         | 1  |
|          |                           | Stem-like    | 1                    | 0           | 0            | 0         | 0  |
|          |                           | TA           | 0                    | 2           | 0            | 0         | 4  |

  

| <b>b</b> |                           |              | subgroups from paper |             |              |           |    |
|----------|---------------------------|--------------|----------------------|-------------|--------------|-----------|----|
|          |                           |              | enterocyte           | goblet-like | inflammatory | stem-like | TA |
| fold1    | predicted by our proteins | enterocyte   | 0                    | 0           | 1            | 0         | 0  |
|          |                           | goblet-like  | 0                    | 1           | 0            | 0         | 1  |
|          |                           | inflammatory | 1                    | 1           | 1            | 0         | 2  |
|          |                           | stem-like    | 1                    | 0           | 0            | 3         | 1  |
|          |                           | TA           | 1                    | 1           | 1            | 1         | 1  |
| fold2    | predicted by our proteins | enterocyte   | 3                    | 0           | 0            | 0         | 1  |
|          |                           | goblet-like  | 0                    | 2           | 0            | 0         | 0  |
|          |                           | inflammatory | 0                    | 1           | 1            | 0         | 0  |
|          |                           | stem-like    | 0                    | 0           | 1            | 2         | 1  |
|          |                           | TA           | 0                    | 0           | 1            | 2         | 3  |
| fold3    | predicted by our proteins | enterocyte   | 1                    | 0           | 0            | 0         | 0  |
|          |                           | goblet-like  | 0                    | 1           | 1            | 0         | 0  |

|        |                           |              |   |   |   |   |   |
|--------|---------------------------|--------------|---|---|---|---|---|
|        |                           | inflammatory | 0 | 0 | 0 | 0 | 2 |
|        |                           | stem-like    | 1 | 0 | 2 | 4 | 0 |
|        |                           | TA           | 1 | 2 | 0 | 0 | 3 |
| fold4  | predicted by our proteins | enterocyte   | 1 | 0 | 0 | 0 | 0 |
|        |                           | goblet-like  | 0 | 0 | 1 | 0 | 1 |
|        |                           | inflammatory | 0 | 0 | 1 | 2 | 0 |
|        |                           | stem-like    | 0 | 0 | 0 | 2 | 1 |
|        |                           | TA           | 2 | 3 | 1 | 0 | 2 |
| fold5  | predicted by our proteins | enterocyte   | 2 | 0 | 0 | 1 | 0 |
|        |                           | goblet-like  | 0 | 1 | 0 | 0 | 1 |
|        |                           | inflammatory | 0 | 0 | 1 | 0 | 1 |
|        |                           | stem-like    | 0 | 0 | 2 | 2 | 0 |
|        |                           | TA           | 0 | 1 | 0 | 0 | 2 |
| fold6  | predicted by our proteins | enterocyte   | 0 | 1 | 1 | 0 | 0 |
|        |                           | goblet-like  | 0 | 1 | 0 | 0 | 0 |
|        |                           | inflammatory | 0 | 0 | 1 | 0 | 0 |
|        |                           | stem-like    | 1 | 0 | 1 | 3 | 0 |
|        |                           | TA           | 1 | 0 | 0 | 0 | 4 |
| fold7  | predicted by our proteins | enterocyte   | 1 | 0 | 2 | 0 | 2 |
|        |                           | goblet-like  | 0 | 1 | 0 | 0 | 0 |
|        |                           | inflammatory | 0 | 0 | 1 | 0 | 1 |
|        |                           | stem-like    | 1 | 1 | 0 | 3 | 0 |
|        |                           | TA           | 0 | 0 | 0 | 0 | 1 |
| fold8  | predicted by our proteins | enterocyte   | 1 | 0 | 0 | 0 | 1 |
|        |                           | goblet-like  | 1 | 0 | 0 | 1 | 2 |
|        |                           | inflammatory | 0 | 0 | 1 | 0 | 0 |
|        |                           | stem-like    | 0 | 0 | 0 | 2 | 0 |
|        |                           | TA           | 0 | 2 | 1 | 0 | 1 |
| fold9  | predicted by our proteins | enterocyte   | 1 | 0 | 0 | 0 | 1 |
|        |                           | goblet-like  | 0 | 0 | 2 | 0 | 0 |
|        |                           | inflammatory | 1 | 1 | 0 | 2 | 1 |
|        |                           | stem-like    | 0 | 0 | 0 | 1 | 0 |
|        |                           | TA           | 0 | 1 | 0 | 0 | 2 |
| fold10 | predicted by our proteins | enterocyte   | 2 | 0 | 1 | 0 | 1 |
|        |                           | goblet-like  | 0 | 2 | 0 | 0 | 0 |
|        |                           | inflammatory | 0 | 0 | 1 | 1 | 0 |
|        |                           | stem-like    | 0 | 0 | 0 | 2 | 0 |
|        |                           | TA           | 0 | 0 | 0 | 0 | 3 |

**Appendix Table S14.** The performance of individual localization signature proteins on the protein or transcript levels. The predictive ability of each predictor at a time was assessed within cross validation (CV) **a**, in the SRM proteomic data set, and **b**, in the TCGA transcriptomic data set. AUCfull denotes an upper level of performance reported for the predictive model on the full data set. AUCmedian represents an unbiased performance derived from the pseudomedian fold of the cross-validation.

|                    | <b>a</b>                                                       | <b>b</b>                                               |
|--------------------|----------------------------------------------------------------|--------------------------------------------------------|
| Signature proteins | <b>SRM data set</b><br><b>10-fold CV</b><br>AUCfull, AUCmedian | <b>TCGA</b><br><b>10-fold CV</b><br>AUCfull, AUCmedian |
| CADM1              | 0.62, 0.63                                                     | 0.51, 0.58                                             |
| LGALS3BP           | 0.66, 0.71                                                     | 0.55, 0.54                                             |
| HYOU1              | 0.61, 0.68                                                     | 0.53, 0.56                                             |

|      |            |            |
|------|------------|------------|
| FN1  | 0.55, 0.64 | 0.57, 0.55 |
| VTN  | 0.57, 0.59 | 0.52, 0.59 |
| LRG1 | 0.59, 0.59 | 0.52, 0.60 |
| MRC2 | 0.54, 0.58 | 0.51, 0.57 |

**Appendix Table S15.** Functional annotation of signature proteins with gene ontology (GO) biological process terms. **a**, Detailed protein annotation with individual GO terms. **b**, Protein annotation with summarized GO terms that were collapsed into four main categories.

| <b>a</b>  |           |                                                                                                                                                                            |
|-----------|-----------|----------------------------------------------------------------------------------------------------------------------------------------------------------------------------|
| Accession | Gene name | GO Biological Process                                                                                                                                                      |
| Q9BY67    | CADM1     | signal transduction;cell adhesion                                                                                                                                          |
| P16070    | CD44      | immune system process;cell adhesion                                                                                                                                        |
| P33151    | CDH5      | cell adhesion                                                                                                                                                              |
| P08603    | CFH       | complement activation;signal transduction;cell adhesion;proteolysis;innate immune response                                                                                 |
| P00450    | CP        | copper ion transport;transmembrane transport                                                                                                                               |
| P12259    | F5        | immune system process;cell adhesion;proteolysis;signal transduction;angiogenesis                                                                                           |
| Q9UGM5    | FETUB     | endopeptidase activity                                                                                                                                                     |
| P02679    | FGG       | signal transduction;cell adhesion                                                                                                                                          |
| P02751    | FN1       | signal transduction;cell adhesion;acute-phase response;angiogenesis                                                                                                        |
| P01892    | HLA-A     | B cell mediated immunity;cellular defense response; regulation of immune response                                                                                          |
| P00738    | HP        | complement activation;proteolysis;response to stress;acute-phase response                                                                                                  |
| Q9Y4L1    | HYOU1     | immune system process;cellular protein metabolic process                                                                                                                   |
| P01859    | IGHG2     | complement activation;innate immune response                                                                                                                               |
| Q14624    | ITIH4     | proteolysis;acute-phase response;endopeptidase activity;hyaluronan metabolic process                                                                                       |
| Q08380    | LGALS3BP  | macrophage activation;extracellular transport;apoptosis;signal transduction;cell adhesion;proteolysis;cellular defense response                                            |
| P02750    | LRG1      | immune system process;cytokine-mediated signaling;cell adhesion                                                                                                            |
| Q9UBG0    | MRC2      | macrophage activation;intracellular protein transport                                                                                                                      |
| P01833    | PIGR      | B cell mediated immunity;intracellular protein transport                                                                                                                   |
| P27169    | PON1      | peroxidase activity;immune system process;phosphate metabolic process                                                                                                      |
| Q12913    | PTPRJ     | MAPK activity;T cell receptor signaling;cell migration;cell proliferation;EGFR signaling;protein tyrosine phosphatase activity                                             |
| P01011    | SERPINA3  | proteolysis;acute-phase response;inflammatory response; maintenance of gastrointestinal epithelium;endopeptidase activity                                                  |
| P01033    | TIMP1     | proteolysis;endopeptidase activity;apoptosis;cell migration;cell proliferation                                                                                             |
| P04004    | VTN       | cell adhesion;signal transduction;innate immune response;endopeptidase activity;cell migration;vascular endothelial growth factor receptor signaling;complement activation |
| <b>b</b>  |           |                                                                                                                                                                            |
| Accession | Gene name | GO Biological Process                                                                                                                                                      |
| Q9BY67    | CADM1     | cell adhesion(1);signal transduction(2)                                                                                                                                    |
| P16070    | CD44      | cell adhesion(1);immune system process(3)                                                                                                                                  |
| P33151    | CDH5      | cell adhesion(1)                                                                                                                                                           |
| P08603    | CFH       | cell adhesion(1);signal transduction(2);immune system process(3);complement activation(3);proteolysis(4)                                                                   |
| P00450    | CP        | transport(2)                                                                                                                                                               |
| P12259    | F5        | cell adhesion(1);angiogenesis(1);signal transduction(2);immune system process(3);proteolysis(4)                                                                            |
| Q9UGM5    | FETUB     | endopeptidase activity(4)                                                                                                                                                  |
| P02679    | FGG       | cell adhesion(1);signal transduction(2)                                                                                                                                    |
| P02751    | FN1       | cell adhesion(1);angiogenesis(1);signal transduction(2);inflammatory response(3)                                                                                           |
| P01892    | HLA-A     | immune system process(3)                                                                                                                                                   |
| P00738    | HP        | inflammatory response(3);complement activation(3);proteolysis(4)                                                                                                           |
| Q9Y4L1    | HYOU1     | metabolic process(2);immune system process(3)                                                                                                                              |
| P01859    | IGHG2     | immune system process(3);complement activation(3)                                                                                                                          |
| Q14624    | ITIH4     | metabolic process(2);inflammatory response(3);proteolysis(4);endopeptidase activity(4)                                                                                     |
| Q08380    | LGALS3BP  | cell adhesion(1);apoptosis(1);signal transduction(2);transport(2);immune system                                                                                            |

|        |          |                                                                                                                                  |
|--------|----------|----------------------------------------------------------------------------------------------------------------------------------|
|        |          | process(3);proteolysis(4)                                                                                                        |
| P02750 | LRG1     | cell adhesion(1);signaling transduction(2);immune system process(3)                                                              |
| Q9UBG0 | MRC2     | transport(2);immune system process(3)                                                                                            |
| P01833 | PIGR     | transport(2);immune system process(3)                                                                                            |
| P27169 | PON1     | metabolic process(2);immune system process(3);peroxidase activity(4)                                                             |
| Q12913 | PTPRJ    | migration(1);proliferation(1);signal transduction(2)                                                                             |
| P01011 | SERPINA3 | maintenance of gastrointestinal epithelium(1);inflammatory response(3);proteolysis(4);endopeptidase activity(4)                  |
| P01033 | TIMP1    | migration(1);proliferation(1);apoptosis(1);proteolysis(4);endopeptidase activity(4)                                              |
| P04004 | VTN      | cell adhesion(1);migration(1);signal transduction(2);immune system process(3);complement activation(3);endopeptidase activity(4) |

GO groups: (1) cell adhesion/migration/angiogenesis/proliferation/apoptosis/(maintenance of gastrointestinal epithelium); (2) signal transduction/transport/(metabolic process); (3) immune system process/inflammatory response/(complement activation); (4) proteolysis/endopeptidase activity/(peroxidase activity)



# Appendix Figure S1

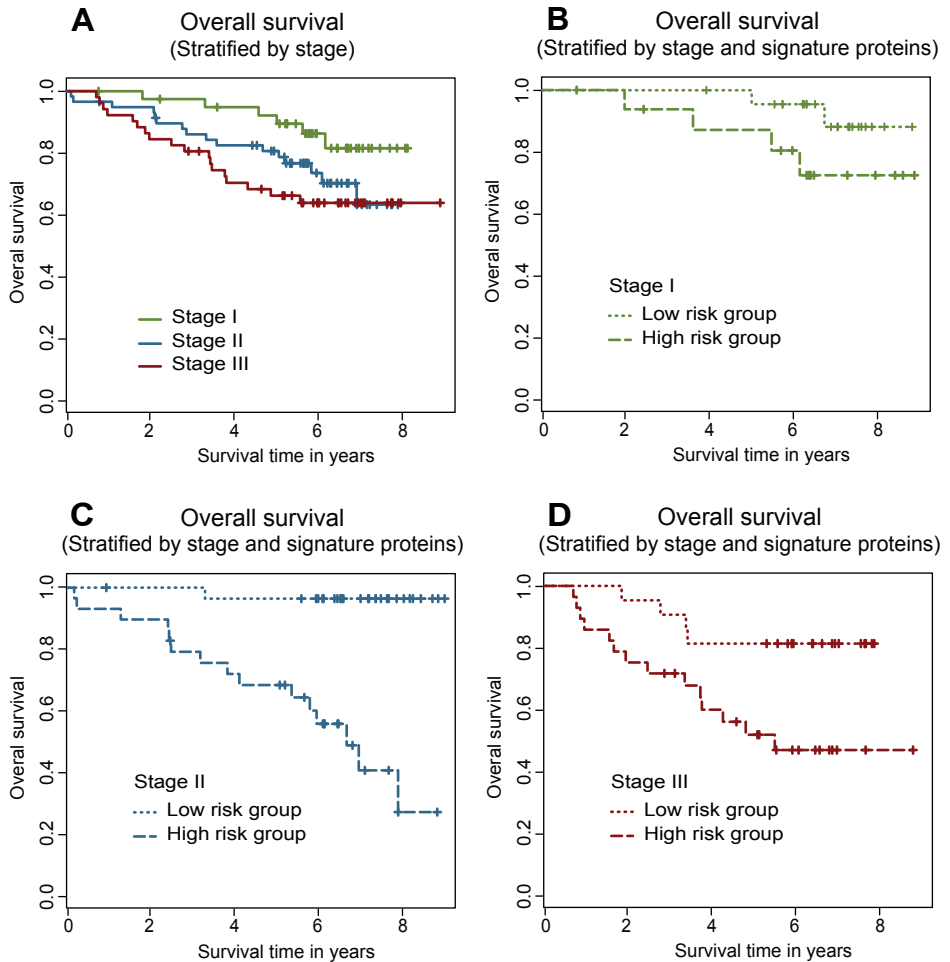

# Appendix Figure S2

**A**

5-year overall survival  
(Cox regression)

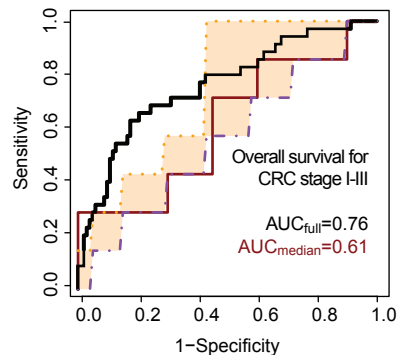

**GSE17536 transcriptomic data set**

Clinical factors (age, gender, stage),  
HLA-A, CFH, CD44, PTPRJ, HP,  
CDH5

| Fold | AUC <sub>TRAIN</sub> | AUC <sub>LEFT-OUT</sub> |
|------|----------------------|-------------------------|
| 1    | 0.72                 | 0.83                    |
| 2    | 0.75                 | 0.72                    |
| 3    | 0.77                 | 0.59                    |
| 4    | 0.78                 | 0.61                    |
| 5    | 0.80                 | 0.50                    |

**B**

Overall survival  
(Predicted by stage)

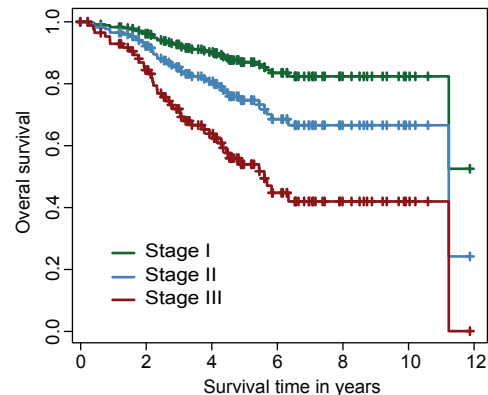

**C**

Overall survival  
(Predicted by stage and signature proteins)

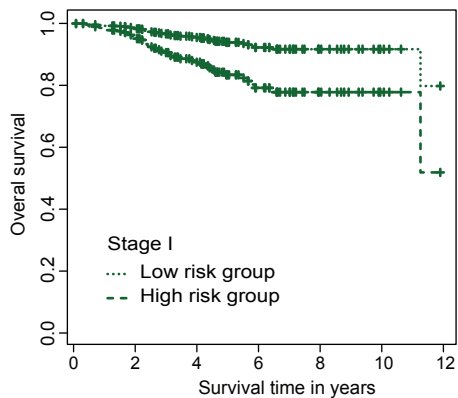

**D**

Overall survival  
(Predicted by stage and signature proteins)

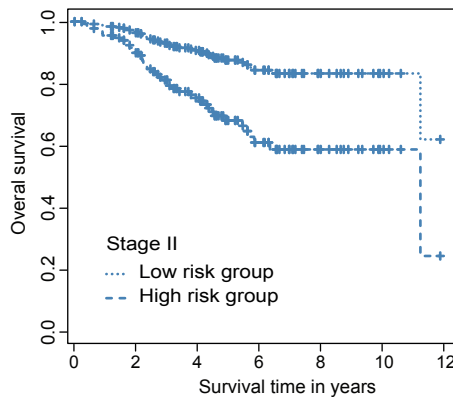

**E**

Overall survival  
(Predicted by stage and signature proteins)

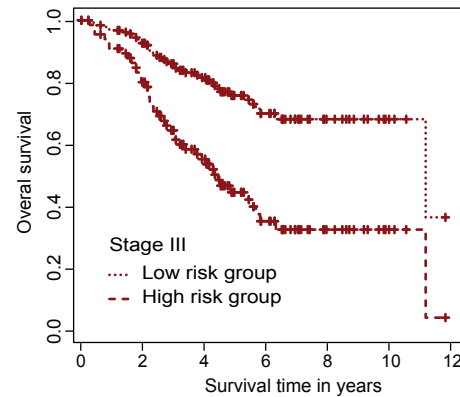

# Appendix Figure S3

**A**

5-year disease-free survival  
(Cox regression)

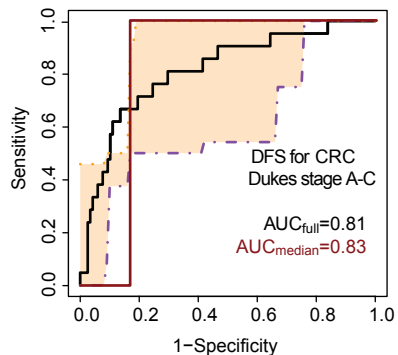

**GSE14333 transcriptomic data set**

Clinical factors (age, gender, stage),  
HLA-A, CFH, CD44, PTPRJ, HP,  
CDH5

| Fold | AUC <sub>TRAIN</sub> | AUC <sub>LEFT-OUT</sub> |
|------|----------------------|-------------------------|
| 1    | 0.81                 | 0.67                    |
| 2    | 0.81                 | 0.88                    |
| 3    | 0.81                 | 0.79                    |
| 4    | 0.88                 | 0.33                    |
| 5    | 0.81                 | 0.58                    |
| 6    | 0.83                 | 0.63                    |
| 7    | 0.81                 | 0.83                    |
| 8    | 0.80                 | 0.92                    |
| 9    | 0.81                 | 0.91                    |
| 10   | 0.80                 | 0.91                    |

**B**

DFS  
(Predicted by stage)

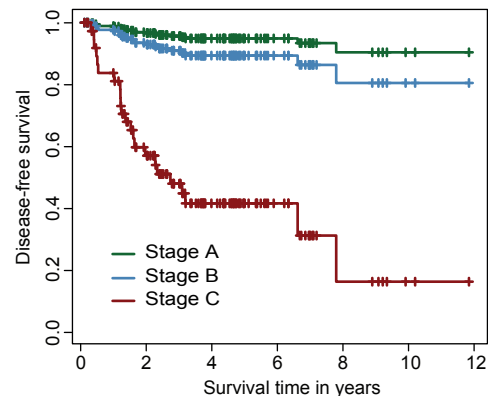

**C**

DFS  
(Predicted by stage and signature proteins)

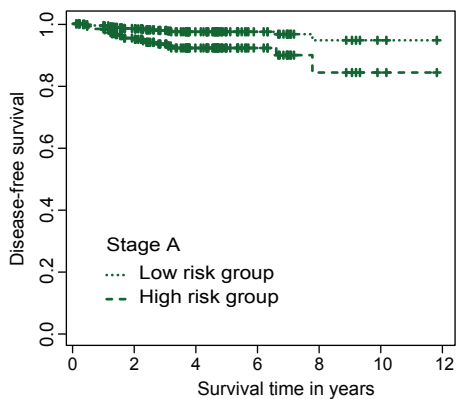

**D**

DFS  
(Predicted by stage and signature proteins)

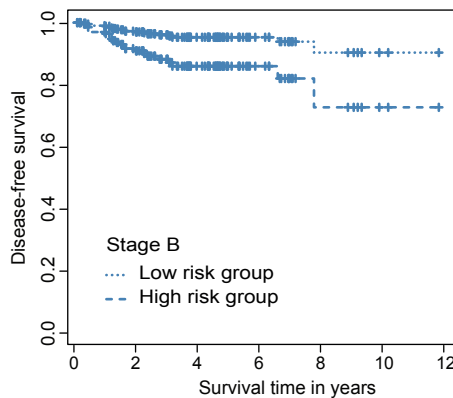

**E**

DFS  
(Predicted by stage and signature proteins)

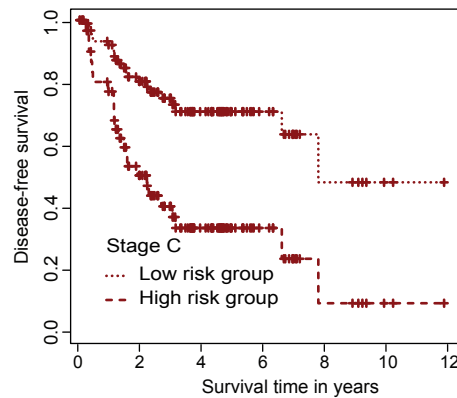

## Appendix Figure S4

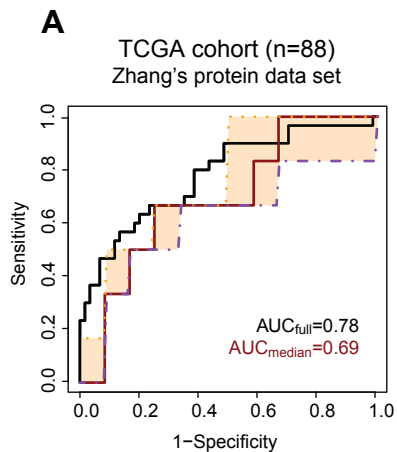

| Fold | $AUC_{TRAIN}$ | $AUC_{LEFT-OUT}$ |
|------|---------------|------------------|
| 1    | 0.74          | 0.90             |
| 2    | 0.78          | 0.69             |
| 3    | 0.82          | 0.61             |
| 4    | 0.81          | 0.47             |
| 5    | 0.75          | 0.76             |

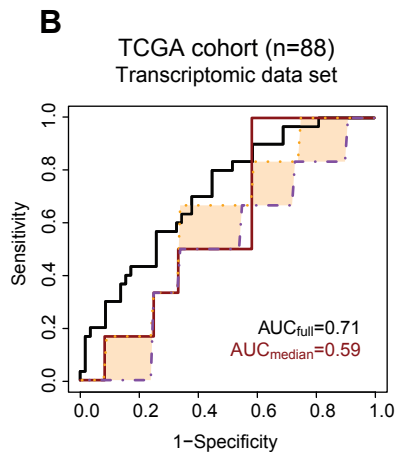

| Fold | $AUC_{TRAIN}$ | $AUC_{LEFT-OUT}$ |
|------|---------------|------------------|
| 1    | 0.73          | 0.58             |
| 2    | 0.69          | 0.61             |
| 3    | 0.74          | 0.59             |
| 4    | 0.73          | 0.65             |
| 5    | 0.73          | 0.44             |

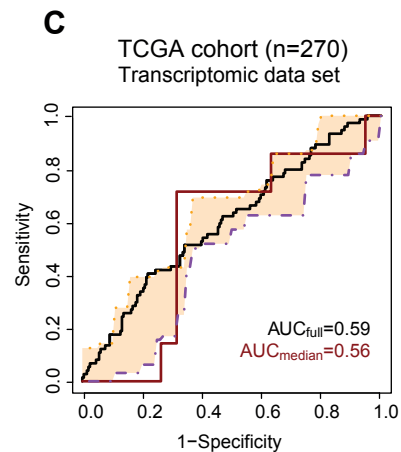

| Fold | $AUC_{TRAIN}$ | $AUC_{LEFT-OUT}$ |
|------|---------------|------------------|
| 1    | 0.61          | 0.51             |
| 2    | 0.59          | 0.61             |
| 3    | 0.59          | 0.55             |
| 4    | 0.59          | 0.39             |
| 5    | 0.61          | 0.57             |
| 6    | 0.60          | 0.50             |
| 7    | 0.58          | 0.63             |
| 8    | 0.63          | 0.68             |
| 9    | 0.58          | 0.56             |
| 10   | 0.61          | 0.54             |

# Appendix Figure S5

TCGA cohort (n=270)  
Transcriptomic data set

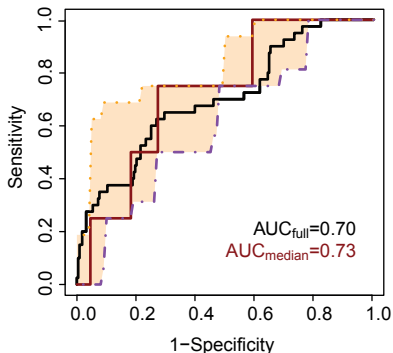

| <b>Fold</b> | <b>AUC<sub>TRAIN</sub></b> | <b>AUC<sub>LEFT-OUT</sub></b> |
|-------------|----------------------------|-------------------------------|
| 1           | 0.71                       | 0.63                          |
| 2           | 0.68                       | 0.90                          |
| 3           | 0.71                       | 0.54                          |
| 4           | 0.73                       | 0.61                          |
| 5           | 0.73                       | 0.57                          |
| 6           | 0.68                       | 0.89                          |
| 7           | 0.69                       | 0.75                          |
| 8           | 0.73                       | 0.50                          |
| 9           | 0.69                       | 0.73                          |
| 10          | 0.68                       | 0.88                          |
